# Supplementary material
Source: ML conference proceedings conference paper supplement (https://proceedings.neurips.cc/paper_files/paper/2023/hash/a6df53f082619d02b9fad64a022e5de3-Abstract.html)
Supplement: Supplementary file 1 [file a6df53f082619d02b9fad64a022e5de3-Supplemental-Conference.pdf]

## A Additional definitions

We provide the definitions of important terms used throughout the paper. First, recall the definition of covering numbers:

**Definition A.1** (Covering numbers). *Let  $\mathcal{P} := \{P_\theta, \theta \in \Theta\}$  be a parametric family of distributions and  $d : \mathcal{P} \times \mathcal{P} \mapsto [0, \infty)$  be a metric. An  $\epsilon$ -cover of a subset  $\mathcal{P}_K := \{P_\theta : \theta \in K \subset \Theta\}$  of the parametric family of distributions is a set  $K' \subset K$  such that, for each  $\theta \in K$  there exists a  $\theta' \in K'$  that satisfies  $d(P_\theta, P_{\theta'}) \leq \epsilon$ . The  $\epsilon$ -covering number of  $\mathcal{P}_K$  is  $N(\epsilon, \mathcal{P}_K, d) = \min\{\text{card}(K') : K' \text{ is an } \epsilon\text{-cover of } K\}$ , where  $\text{card}(\cdot)$  represents the cardinality of the set.*

Next, recall the definition of a test function [26]:

**Definition A.2** (Test function). *Let  $\tilde{X}_n$  be a sequence of random variables on measurable space  $(\bigotimes_n \mathcal{X}, \mathcal{S}^n)$ . Then any  $\mathcal{S}^n$ -measurable sequence of functions  $\{\phi_n\}$ ,  $\phi_n : \tilde{X}_n \mapsto [0, 1] \forall n \in \mathbb{N}$ , is a test of a hypothesis that a probability measure on  $\mathcal{S}^n$  belongs to a given set against the hypothesis that it belongs to an alternative set. The test  $\phi_n$  is consistent for hypothesis  $P_0^n$  against the alternative  $P^n \in \{P_\theta^n : \theta \in \Theta \setminus \{\theta_0\}\}$  if  $\mathbb{E}_{P^n}[\phi_n] \rightarrow \mathbb{1}_{\{\theta \in \Theta \setminus \{\theta_0\}\}}(\theta), \forall \theta \in \Theta$  as  $n \rightarrow \infty$ , where  $\mathbb{1}_{\{\cdot\}}$  is an indicator function.*

A classic example of a test function is  $\phi_n^{\text{KS}} = \mathbb{1}_{\{\text{KS}_n > K_\nu\}}(\theta)$  that is constructed using the Kolmogorov-Smirnov statistic  $\text{KS}_n := \sup_t |\mathbb{F}_n(t) - \mathbb{F}_\theta(t)|$ , where  $\mathbb{F}_n(t)$  and  $\mathbb{F}_\theta(t)$  are the empirical and true distribution respectively, and  $K_\nu$  is the confidence level. If the null hypothesis is true, the Glivenko-Cantelli theorem [29, Theorem 19.1] shows that the KS statistic converges to zero as the number of samples increases to infinity.

Furthermore, we define the Hellinger distance  $h(\theta_1, \theta_2)$  between the two probability distributions  $P_{\theta_1}$  and  $P_{\theta_2}$  is defined as  $d_H(\theta_1, \theta_2) = \left( \int (\sqrt{dP_{\theta_1}} - \sqrt{dP_{\theta_2}})^2 \right)^{1/2}$ . We define the one-sided Hausdorff distance  $H(A||B)$  between sets  $A$  and  $B$  in a metric space  $D$  with distance function  $d$  is defined as:

$$H(A||B) = \sup_{x \in A} d_h(x, B), \text{ where } d_h(x, B) = \inf_{y \in B} d(x, y).$$

Next, we define an arbitrary loss function  $L_n : \Theta \times \Theta \mapsto \mathbb{R}$  that measures the distance between models  $(P_{\theta_1}^n, P_{\theta_2}^n) \forall \{\theta_1, \theta_2\} \in \Theta$ . At the outset, we assume that  $L_n(\theta_1, \theta_2)$  is always positive. We define  $\{\epsilon_n\}$  as a sequence such that  $\epsilon_n \rightarrow 0$  as  $n \rightarrow \infty$  and  $n\epsilon_n^2 \geq 1$ .

We also define

**Definition A.3** ( $\Gamma$ -convergence). *A sequence of functions  $F_n : \mathcal{U} \mapsto \mathbb{R}$ , for each  $n \in \mathbb{N}$ ,  $\Gamma$ -converges to  $F : \mathcal{U} \mapsto \mathbb{R}$ , if*

- for every  $u \in \mathcal{U}$  and every  $\{u_n, n \in \mathbb{N}\}$  such that  $u_n \rightarrow u$ ,  $F(x) \leq \liminf_{n \rightarrow \infty} F_n(u_n)$ ;
- for every  $u \in \mathcal{U}$ , there exists some  $\{u_n, n \in \mathbb{N}\}$  such that  $u_n \rightarrow u$ ,  $F(x) \geq \limsup_{n \rightarrow \infty} F_n(u_n)$ .

In addition, we define

**Definition A.4** (Primal feasibility). *For any two functions  $f : \mathcal{U} \mapsto \mathbb{R}$  and  $b : \mathcal{U} \mapsto \mathbb{R}$ , a point  $u^* \in \mathcal{U}$  is primal feasible to the following constraint optimization problem*

$$\inf_{u \in \mathcal{U}} f(u) \text{ subject to } b(u) \leq c,$$

*if  $b(u^*) \leq c$ , for a given  $c \in \mathbb{R}$ .*

## B Applications

### B.1 Single product newsvendor problem (cont.)

First, we fix the sieve set  $\Theta_n(\epsilon) = \Theta$ , which clearly implies that the restricted inverse-gamma prior  $\Pi(\theta)$ , places no mass on the complement of this set and therefore satisfies Assumption 2.2.

Second, under the condition that the true demand distribution is exponential with parameter  $\theta_0$  (and  $P_0 \equiv P_{\theta_0}$ ), we demonstrate the existence of test functions satisfying Assumption 2.1.

**Lemma B.1.** Fix  $n \geq 5$ . Then, for any  $\epsilon > \epsilon_n := \frac{1}{\sqrt{n}}$  with  $\epsilon_n \rightarrow 0$ , and  $n\epsilon_n^2 \geq 1$ , there exists a test function  $\phi_n$  (depending on  $\epsilon$ ) such that  $L_n^{NV}(\theta, \theta_0) = n(\sup_{a \in \mathcal{A}} |R(a, \theta) - R(a, \theta_0)|)^2$  satisfies Assumption 2.1 with  $C_0 = 20$  and  $C = \frac{C_1}{2}(K_1^{NV})^{-2}$  for a constant  $C_1 > 0$  and  $K_1^{NV} = d_H(T, \theta_0)^{-1} \left[ \left( \frac{h}{\theta_0} - \frac{h}{T} \right)^2 + (b+h)^2 \left( \frac{e^{-aT}}{T} - \frac{e^{-a\theta_0}}{\theta_0} \right) \right]^{1/2}$ .

The proof of the above result follows by showing that  $d_L^{NV} = n^{-1/2} \sqrt{L_n^{NV}(\theta, \theta_0)}$  can be bounded above by the Hellinger distance between two exponential distributions on  $\Theta$  (under which a test function exists) in Lemma C.10 in the appendix.

Third, we show that there exist appropriate constants such that the inverse-gamma prior satisfies Assumption 2.3 when the demand distribution is exponential.

**Lemma B.2.** Fix  $n_2 \geq 2$  and any  $\lambda > 1$ . Let  $A_n := \{\theta \in \Theta : D_{1+\lambda}(P_0^n \| P_\theta^n) \leq C_3 n \epsilon_n^2\}$ , where  $D_{1+\lambda}(P_0^n \| P_\theta^n)$  is the Rényi divergence between  $P_0^n$  and  $P_\theta^n$ . Then for  $\epsilon_n^2 = \frac{\log n}{n}$  and any  $C_3 > 0$  such  $C_2 = \alpha C_3 \geq 2$ , the truncated inverse-gamma prior  $\text{Inv} - \Gamma_\Theta(A; \alpha, \beta)$  satisfies  $\Pi(A_n) \geq \exp(-nC_2 \epsilon_n^2), \forall n \geq n_2$ .

Fourth, it is straightforward to see that the newsvendor model risk  $R(a, \theta)$  is bounded below for a given  $a \in \mathcal{A}$ .

**Lemma B.3.** For any  $a \in \mathcal{A}$  and positive constants  $h$  and  $b$ , the newsvendor model risk  $R(a, \theta) = \left( ha - \frac{h}{\theta} + (b+h) \frac{e^{-a\theta}}{\theta} \right) \geq \left( \frac{ha^2 \theta^*}{(1+a\theta^*)} \right)$ , where  $\underline{a} := \min\{a \in \mathcal{A}\}$  and  $\theta^*$  satisfies  $h - (b+h)e^{-a\theta^*}(1+a\theta^*) = 0$ .

This implies that  $R(a, \theta)$  satisfies Assumption 2.5. Finally, we also show that the newsvendor model risk satisfies Assumption 2.4.

**Lemma B.4.** Fix  $n \geq 1$  and  $\gamma > 0$ . For any  $\epsilon > \epsilon_n$  and any  $a \in \mathcal{A}$ ,  $R(a, \theta)$  satisfies  $\mathbb{E}_\Pi[\mathbb{1}_{\{R(a, \theta) \gamma > C_4(\gamma) n \epsilon^2\}} e^{\gamma R(a, \theta)}] \leq \exp(-C_5(\gamma) n \epsilon^2)$ , for any  $C_4(\gamma) > 2\gamma(h\bar{a} + \frac{b}{T})$  and  $C_5(\gamma) = C_4(\gamma) - 2\gamma(h\bar{a} + \frac{b}{T})$ , where  $\bar{a} := \max\{a \in \mathcal{A}\}$ .

Note that Lemma B.1 implies that  $C = \frac{C_1}{2(K_1^{NV})^2}$  for any constant  $C_1 > 0$ . Fixing  $\alpha = 1$  and using Lemma B.2 we can choose  $C_2 = C_3 = 2$ . Now,  $C_1$  can be chosen large enough such that  $C > C_4(\gamma) + C_5(\gamma)$  for a given risk sensitivity  $\gamma > 0$ . Therefore, the condition on constants in Theorem 3.1 reduces to  $C_5(\gamma) > 2 + C_2 + C_3 = 5$ , and it can be satisfied easily by fixing  $C_5(\gamma) = 5.1$  (say).

These lemmas show that when the demand distribution is exponential and with a non-conjugate truncated inverse-gamma prior, our result in Theorem 3.2 can be used for RSVB method to bound the optimality gap in decisions and values for various values of the risk-sensitivity parameter  $\gamma$ . Recall that the bound obtained in Theorem 3.2 depends on  $\epsilon_n^2$  and  $\eta_n^R(\gamma)$ .

Lemma B.2 implies that  $\epsilon_n^2 = \frac{\log n}{n}$ , but in order to get the complete bound we further need to characterize  $\eta_n^R(\gamma)$ . Recall that, as a consequence of Assumption 3.1 in Proposition 3.1, for a given  $C_8 = -\inf_{Q \in \mathcal{Q}} \inf_{a \in \mathcal{A}} \mathbb{E}_Q[R(a, \theta)]$  that  $C_9 > 0$  and  $\eta_n^R(\gamma) \leq \gamma n^{-1} C_8 + C_9 \epsilon_n'^2$ .

Therefore, in our next result, we show that in the newsvendor setting, we can construct a sequence  $\{Q_n(\theta)\} \subset \mathcal{Q}$  that satisfies Assumption 3.1, and thus identify  $\epsilon_n'$  and the constant  $C_9$ . We fix  $\mathcal{Q}$  to be the family of shifted gamma distributions with support  $[T, \infty)$ .

**Lemma B.5.** Let  $\{Q_n(\theta)\}$  be a sequence of shifted gamma distributions with shape parameter  $a = n$  and rate parameter  $b = \frac{n}{\theta_0}$ , then for truncated inverse gamma prior and exponentially distributed likelihood model

$$\frac{1}{n} \left[ \text{KL}(Q_n(\theta) \| \Pi(\theta)) + \mathbb{E}_{Q_n(\theta)} \left[ \text{KL}(dP_0^n(\tilde{X}_n) \| dP_\theta^n(\tilde{X}_n)) \right] \right] \leq C_9 \epsilon_n'^2,$$

where  $\epsilon_n'^2 = \frac{\log n}{n}$  and  $C_9 = \frac{1}{2} + \max\left(0, 2 + \frac{2\beta}{\theta_0} - \log \sqrt{2\pi} - \log\left(\frac{\beta^\alpha}{\Gamma(\alpha)}\right) + \alpha \log \theta_0\right)$  and prior parameters are chosen such that  $C_9 > 0$ .

## B.2 Multi-product newsvendor problem

Analogous to the one-dimensional newsvendor loss function, the loss function in its multi-product version is defined as

$$\ell(a, \xi) := h^T(a - \xi)^+ + b^T(\xi - a)^+$$

where  $h$  and  $b$  are given vectors of underage and overage costs respectively for each product and mapping  $(\cdot)^+$  is defined component-wise. We assume that there are  $d$  items or products and  $\xi \in \mathbb{R}^d$  denotes the random vector of demands. Let  $a \in \mathcal{A} \subset \mathbb{R}_+^d$  be the inventory or decision variable, typically assumed to take values in a compact decision space  $\mathcal{A}$  with  $\underline{a} := \{\{\min\{a_i : a_i \in \mathcal{A}_i\}\}_{i=1}^d\}$  and  $\bar{a} := \{\{\max\{a_i : a_i \in \mathcal{A}_i\}\}_{i=1}^d\}$ , and  $\underline{a} > 0$ , where  $\mathcal{A}_i$  is the marginal set of  $i^{th}$  component of  $\mathcal{A}$ . The random demand is assumed to be multivariate Gaussian, with unknown mean parameter  $\theta \in \mathbb{R}^d$  but with known covariance matrix  $\Sigma$ . We also assume that  $\Sigma$  is a symmetric positive definite matrix and can be decomposed as  $Q^T \Lambda Q$ , where  $Q$  is an orthogonal matrix and  $\Lambda$  is a diagonal matrix consisting of respective eigenvalues of  $\Sigma$ . We also define  $\bar{\Lambda} = \max_{i \in \{1, 2, \dots, d\}} \Lambda_{ii}$  and  $\underline{\Lambda} = \min_{i \in \{1, 2, \dots, d\}} \Lambda_{ii}$ . The model risk

$$\begin{aligned} R(a, \theta) &= \mathbb{E}_{P_\theta}[\ell(a, \xi)] = \sum_{i=1}^d \mathbb{E}_{P_{\theta_i}}[h_i(a_i - \xi_i)^+ + b_i(\xi_i - a_i)^+] \\ &= \sum_{i=1}^d \left[ (h_i + b_i)a_i \Phi\left(\frac{(a_i - \theta_i)}{\sigma_{ii}}\right) - b_i a_i + \theta_i(b_i - h_i) \right. \\ &\quad \left. + \sigma_{ii} \left[ h \frac{\phi\left(\frac{(a_i - \theta_i)}{\sigma_{ii}}\right)}{\Phi\left(\frac{(a_i - \theta_i)}{\sigma_{ii}}\right)} + b \frac{\phi\left(\frac{(a_i - \theta_i)}{\sigma_{ii}}\right)}{1 - \Phi\left(\frac{(a_i - \theta_i)}{\sigma_{ii}}\right)} \right] \right], \end{aligned} \quad (11)$$

which is convex in  $a$ . Here  $P_{\theta_i}$  is the marginal distribution of  $\xi$  for  $i^{th}$  product,  $\phi(\cdot)$  and  $\Phi(\cdot)$  are probability and cumulative distribution function of the standard Normal distribution. We also assume that the true mean parameter  $\theta_0$  lies in a compact subspace  $\Theta \subset \mathbb{R}^d$ . We fix the prior to be uniformly distributed on  $\Theta$  with no correlation across its components, that is  $\pi(A) = \frac{m(A \cap \Theta)}{m(\Theta)} = \prod_{i=1}^d \frac{m(A_i \cap \Theta_i)}{m(\Theta_i)}$ , where  $m(B)$  is the Lebesgue measure (or volume) of  $B \subset \mathbb{R}^d$ . As in the previous example, we fix the sieve set  $\Theta_n(\epsilon) = \Theta$ , which clearly implies that  $\Pi(\theta)$  places no mass on the complement of this set and therefore satisfies Assumption 2.2.

Then under the condition that the true demand distribution has a multivariate Gaussian distribution (with known  $\Sigma$ ) and mean  $\theta_0$  ( $P_0 \equiv P_{\theta_0}$ ), we demonstrate the existence of test functions satisfying Assumption 2.1 by constructing a test function unlike the single-product newsvendor problem with exponential demand.

**Lemma B.6.** *Fix  $n \geq 1$ . Then, for any  $\epsilon > \epsilon_n := \frac{1}{\sqrt{n}}$  with  $\epsilon_n \rightarrow 0$ , and  $n\epsilon_n^2 \geq 1$  and test function  $\phi_{n,\epsilon} := \mathbb{1}_{\{\tilde{X}_n : \|\hat{\theta}_n - \theta_0\| > \sqrt{\tilde{C}\epsilon^2}\}}$ ,  $L_n^{MNV}(\theta, \theta_0) = n (\sup_{a \in \mathcal{A}} |R(a, \theta) - R(a, \theta_0)|)^2$  satisfies Assumption 2.1 with  $C_0 = 1$ ,  $C_1 = 4K^2C$  and  $C = 1/8 \left( \frac{\tilde{C}}{d\bar{\Lambda}} - 1 \right)$  for sufficiently large  $\tilde{C}$  such that  $C > 1$  and  $\bar{\Lambda} = \max_{i \in \{1, 2, \dots, d\}} \Lambda_{ii}$ , where  $K = \sup_{\mathcal{A}, \Theta} \|\partial_\theta R(a, \theta)\|$ .*

In the following result, we show that there exist appropriate constants such that prior distribution satisfies Assumption 2.3 when the demand distribution is a multivariate Gaussian with unknown mean.

**Lemma B.7.** *Fix  $n_2 \geq 2$  and any  $\lambda > 1$ . Let  $A_n := \{\theta \in \Theta : D_{1+\lambda}(P_0^n \| P_\theta^n) \leq C_3 n \epsilon_n^2\}$ , where  $D_{1+\lambda}(P_0^n \| P_\theta^n)$  is the Rényi Divergence between  $P_0^n$  and  $P_\theta^n$ . Then for  $\epsilon_n^2 = \frac{\log n}{n}$  and any  $C_3 > 0$  such that  $C_2 = \frac{4d}{\bar{\Lambda}(\lambda+1)(\prod_{i=1}^d m(\Theta_i))^{2/d}} C_3 \geq 2$  and for large enough  $n$ , the uncorrelated uniform prior restricted to  $\Theta$  satisfies  $\Pi(A_n) \geq \exp(-nC_2 \epsilon_n^2)$ .*

Next, it is straightforward to see that the multi-product newsvendor model risk  $R(a, \theta)$  is bounded below for a given  $a \in \mathcal{A}$  on a compact set  $\Theta$  and thus it satisfies Assumption 2.5. Finally, we also show that the newsvendor model risk satisfies Assumption 2.4.

**Lemma B.8.** Fix  $n \geq 1$  and  $\gamma > 0$ . For any  $\epsilon > \epsilon_n$  and  $a \in \mathcal{A}$ ,  $R(a, \theta)$  satisfies  $\mathbb{E}_\Pi[\mathbb{1}_{\{G(a, \theta) \gamma > C_4(\gamma) n \epsilon^2\}} e^{\gamma G(a, \theta)}] \leq \exp(-C_5(\gamma) n \epsilon_n^2)$ , for any  $C_4(\gamma) > 2\gamma \sup_{\{a, \theta\} \in \mathcal{A} \otimes \Theta} G(a, \theta)$  and  $C_5(\gamma) = C_4(\gamma) - 2\gamma \sup_{\{a, \theta\} \in \mathcal{A} \otimes \Theta} G(a, \theta)$ .

Similar to single product example, in our next result, we show that in the multi-product newsvendor setting, we can construct a sequence  $\{Q_n(\theta)\} \in \mathcal{Q}$  that satisfies Assumption 3.1, and thus identify  $\epsilon'_n$  and constant  $C_9$ . We fix  $\mathcal{Q}$  to be the family of uncorrelated Gaussian distributions restricted to  $\Theta$ .

**Lemma B.9.** Let  $\{Q_n(\theta)\}$  be a sequence of product of  $d$  univariate Gaussian distribution defined as  $q_n^i(\theta) \propto \frac{1}{\sqrt{2\pi\sigma_{i,n}^2}} e^{-\frac{1}{2\sigma_{i,n}^2}(\theta - \mu_{i,n})^2} \mathbb{1}_{\Theta_i} = \frac{\mathcal{N}(\theta_i | \mu_{i,n}, \sigma_{i,n}) \mathbb{1}_{\Theta_i}}{\mathcal{N}(\Theta_i | \mu_{i,n}, \sigma_{i,n})}$  and fix  $\sigma_{i,n} = 1/\sqrt{n}$  and  $\theta_i = \theta_0^i$  for all  $i \in \{1, 2, \dots, d\}$ . Then for uncorrelated uniform distribution restricted to  $\Theta$  and multivariate normal likelihood model  $\frac{1}{n} [\text{KL}(Q_n(\theta) \| \Pi(\theta)) + \mathbb{E}_{Q_n(\theta)} [\text{KL}(dP_0^n(\tilde{X}_n) \| dP_\theta^n(\tilde{X}_n))]] \leq C_9 \epsilon_n'^2$ , where  $\epsilon_n'^2 = \frac{\log n}{n}$  and  $C_9 := \frac{d}{2} + \max\left(0, -\sum_{i=1}^d [\log(\sqrt{2\pi}e) - \log(m(\Theta_i))] + \frac{d}{2} \underline{\Lambda}^{-1}\right)$ .

Now, using the result established in lemmas above, we bound the optimality gap in values for the multi-product newsvendor model risk.

**Theorem B.1.** Fix  $\gamma > 0$ . Suppose that the set  $\mathcal{A}$  is compact. Then, for the multi-product newsvendor model with multivariate Gaussian distributed demand with known covariance matrix  $\Sigma$  and unknown mean vector  $\theta$  lying in a compact subset  $\Theta \subset \mathbb{R}^d$ , prior  $\Pi(\cdot) = \prod_{i=1}^d \frac{m(\{\cdot\} \cap \Theta_i)}{m(\Theta_i)}$ , and the variational family fixed to uncorrelated Gaussian distribution restricted to  $\Theta$ , and for any  $\tau > 0$ , the  $P_0^n$ -probability of the following event  $\left\{ \tilde{X}_n : R(\mathbf{a}_{\text{RS}}^*, \theta_0) - \inf_{z \in \mathcal{A}} R(z, \theta_0) \leq 2\tau M'(\gamma) \left(\frac{\log n}{n}\right)^{1/2} \right\}$  is at least  $1 - \tau^{-1}$  for sufficiently large  $n$  and for some mapping  $M' : \mathbb{R}^+ \rightarrow \mathbb{R}^+$ , where  $R(\cdot, \theta)$  is the multi-product newsvendor model risk.

*Proof.* The proof is a direct consequence of Theorem 3.2, Lemmas B.6, B.7, B.8, B.9, and Proposition 3.2.  $\square$

### B.3 Gaussian process classification (cont.)

We define the distance function as  $L_n^{GP}(\theta, \theta_0) = n(\sup_{a \in \mathcal{A}} |R(a, \theta) - R(a, \theta_0)|)^2$ . In anticipation of demonstrating that the binary classification model with GP prior and distance function  $L_n^{GP}$  satisfy the desired set of assumptions, we recall the following result, from [30], which will be central in establishing Assumptions 2.1, 2.2, and 2.3.

**Lemma B.10.** [Theorem 2.1 [30]] Let  $\theta(\cdot)$  be a Borel measurable, zero-mean Gaussian random element in a separable Banach space  $(\Theta, \|\cdot\|)$  with reproducing kernel Hilbert space (RKHS)  $(\mathbb{H}, \|\cdot\|_{\mathbb{H}})$  and let  $\theta_0$  be contained in the closure of  $\mathbb{H}$  in  $\Theta$ . For any  $\epsilon > \epsilon_n$  satisfying  $\varphi_{\theta_0}(\epsilon) \leq n\epsilon^2$ , where

$$\varphi_{\theta_0}(\epsilon) = \inf_{h \in \mathbb{H} : \|h - \theta_0\| < \epsilon} \|h\|_{\mathbb{H}}^2 - \log \Pi(\|\theta\| < \epsilon) \quad (12)$$

and any  $C_{10} > 1$  with  $e^{-C_{10}n\epsilon_n^2} < 1/2$ , there exists a measurable set  $\Theta_n(\epsilon) \subset \Theta$  such that

$$\log N(3\epsilon, \Theta_n(\epsilon), \|\cdot\|) \leq 6C_{10}n\epsilon^2, \quad (13)$$

$$\Pi(\theta \notin \Theta_n(\epsilon)) \leq e^{-C_{10}n\epsilon^2}, \quad (14)$$

$$\Pi(\|\theta - \theta_0\| < 4\epsilon_n) \geq e^{-n\epsilon_n^2}. \quad (15)$$

The proof of the lemma above can be easily adapted from the proof of [30, Theorem 2.1], which is specifically for  $\epsilon = \epsilon_n$ . Notice that the result above is true for any norm  $\|\cdot\|$  on the Banach space if that satisfies  $\varphi_{\theta_0}(\epsilon) \leq n\epsilon^2$ . Moreover, if  $\varphi_{\theta_0}(\epsilon_n) \leq n\epsilon_n^2$  is true, then it also holds for any  $\epsilon > \epsilon_n$ , since by definition  $\varphi_{\theta_0}(\epsilon)$  is a decreasing function of  $\epsilon$ .

All the results in the previous lemma depend on  $\varphi_{\theta_0}(\epsilon)$  being less than  $n\epsilon^2$ . In particular, observe that the second term in the definition of  $\varphi_{\theta_0}(\epsilon)$  depends on the prior distribution on  $\Theta$ . Therefore,

[30, Theorem 4.5] show that  $\varphi_{\theta_0}(\epsilon_n) \leq n\epsilon_n^2$  ( with  $\|\cdot\|$  as supremum norm and for  $\epsilon_n$  as defined later in (9) ) is satisfied by the Gaussian prior of type

$$W(\cdot) = \sum_{j=1}^{\bar{J}_\alpha} \sum_{k=1}^{2^{jd}} \mu_j Z_{j,k} \vartheta_{j,k}(\cdot), \quad (16)$$

where  $\{\mu_j\}$  is a sequence that decreases with  $j$ ,  $\{Z_{i,j}\}$  are i.i.d. standard Gaussian random variables and  $\{\vartheta_{j,k}\}$  form a double-indexed orthonormal basis (with respect to measure  $\nu$ ), that is  $\mathbb{E}_\nu[\vartheta_{j,k} \vartheta_{l,m}] = \mathbb{1}_{\{j=l, k=m\}}$ .  $\bar{J}_\alpha$  is the smallest integer satisfying  $2^{\bar{J}_\alpha d} = n^{d/(2\alpha+d)}$  for a given  $\alpha > 0$ . In particular, the GP above is constructed using the function class that is supported on  $[0, 1]^d$  and has a wavelet expansion,  $w(\cdot) = \sum_{j=1}^\infty \sum_{k=1}^{2^{jd}} w_{j,k} \vartheta_{j,k}(\cdot)$ . The wavelet function space is equipped with the  $L_2$ -norm:  $\|w\|_2 = \sum_{j=1}^\infty \left( \sum_{k=1}^{2^{jd}} |w_{j,k}|^2 \right)^{1/2}$ ; the supremum norm:  $\|w\|_\infty = \sum_{j=1}^\infty 2^{jd} \max_{1 \leq k \leq 2^{jd}} |w_{j,k}|$ ; and the Besov  $(\beta, \infty, \infty)$ -norm:  $\|w\|_{\beta; \infty, \infty} = \sup_{1 \leq j < \infty} 2^{j\beta} 2^{jd} \max_{1 \leq k \leq 2^{jd}} |w_{j,k}|$ . Note that  $W$  induces a measure over the RKHS  $\mathbb{H}$ , defined as a collection of truncated wavelet functions  $w(\cdot) = \sum_{j=1}^{\bar{J}_\alpha} \sum_{k=1}^{2^{jd}} w_{j,k} \vartheta_{j,k}(\cdot)$ , with norm induced by the inner-product on  $\mathbb{H}$  as  $\|w\|_{\mathbb{H}}^2 = \sum_{j=1}^{\bar{J}_\alpha} \sum_{k=1}^{2^{jd}} \frac{w_{j,k}^2}{\mu_j^2}$ . The RKHS kernel  $K : [0, 1]^d \times [0, 1]^d \mapsto \mathbb{R}$  can be easily derived as

$$\begin{aligned} K(x, y) &= \mathbb{E}[W(x)W(y)] = \mathbb{E} \left[ \left( \sum_{j=1}^{\bar{J}_\alpha} \sum_{k=1}^{2^{jd}} \mu_j Z_{j,k} \vartheta_{j,k}(y) \right) \left( \sum_{j=1}^{\bar{J}_\alpha} \sum_{k=1}^{2^{jd}} \mu_j Z_{j,k} \vartheta_{j,k}(x) \right) \right] \\ &= \sum_{j=1}^{\bar{J}_\alpha} \sum_{k=1}^{2^{jd}} \mu_j^2 \vartheta_{j,k}(y) \vartheta_{j,k}(x). \end{aligned}$$

Indeed, by the definition of this kernel and inner product, observe that  $\langle K(x, \cdot), w(\cdot) \rangle = \sum_{j=1}^{\bar{J}_\alpha} \sum_{k=1}^{2^{jd}} w_{j,k} \mu_j^2 \vartheta_{j,k}(x) \frac{1}{\mu_j^2} = w(x)$ . Moreover,  $\langle K(x, \cdot), K(y, \cdot) \rangle = \sum_{j=1}^{\bar{J}_\alpha} \sum_{k=1}^{2^{jd}} \mu_j^2 \vartheta_{j,k}(x) \mu_j^2 \vartheta_{j,k}(y) \frac{1}{\mu_j^2} = K(x, y)$ . It is clear from its definition that  $W$  is a centered Gaussian random field on the RKHS.

Next, using the definition of the kernel, we derive the covariance operator of the Gaussian random field  $W$ . Recall that  $Y \sim \nu$ , which enables us to define the covariance operator  $\mathcal{C}$ , following [27, (6.19)] as  $(Ch_\nu)(x) = \int_{[0,1]^d} K(x, y) h_\nu(y) d\nu(y)$ . Also, observe that  $\{\mu_j^2, \varphi_{j,k}\}$  is the eigenvalue and eigen function pair of the covariance operator  $\mathcal{C}$ . Consequently, using Karhunen Loéve expansion [27, Theorem 6.19] the prior induced by  $W$  on  $\mathbb{H}$  is a Gaussian distribution denoted as  $\mathcal{N}(0, \mathcal{C})$ . We also recall the Cameron-Martin space denoted as  $\text{Im}(\mathcal{C}^{1/2})$  associated with a Gaussian measure  $\mathcal{N}(0, \mathcal{C})$  on  $\mathbb{H}$  to be the intersection of all linear spaces of full measure under  $\mathcal{N}(0, \mathcal{C})$  [27, (page 530)]. In particular,  $\text{Im}(\mathcal{C}^{1/2})$  is the Hilbert space with inner product  $\langle \cdot, \cdot \rangle_{\mathcal{C}} = \langle \mathcal{C}^{-1/2} \cdot, \mathcal{C}^{-1/2} \cdot \rangle$ .

Next, we show the existence of test functions in the following result.

**Lemma B.11.** *For any  $\epsilon > \epsilon_n$  with  $\epsilon_n \rightarrow 0$ ,  $n\epsilon_n^2 \geq 2 \log 2$ , and  $\varphi_{\theta_0}(\epsilon) \leq n\epsilon^2$ , there exists a test function  $\phi_n$  (depending on  $\epsilon$ ) such that  $L_n^{GP}(\theta, \theta_0) = n (\sup_{a \in \mathcal{A}} |R(a, \theta) - R(a, \theta_0)|)^2$  satisfies Assumption 2.1 with  $C = 1/6$ ,  $C_0 = 2$  and  $C_1 = (\max(c_+, c_-))^2$ .*

Assumption 2.2 is a direct consequence of (14) in Lemma B.10. Next, we prove that prior distribution and the likelihood model satisfy Assumption 2.3 using (15) of Lemma B.10.

**Lemma B.12.** *For any  $\lambda > 1$ , let  $A_n := \{\theta \in \Theta : D_{1+\lambda}(P_0^n \| P_\theta^n) \leq C_3 n \epsilon_n^2\}$ , where  $D_{1+\lambda}(P_0^n \| P_\theta^n)$  is the Rényi Divergence between  $P_0^n$  and  $P_\theta^n$ . Then for any  $\epsilon > \epsilon_n$  satisfying  $\varphi_{\theta_0}(\epsilon) \leq n\epsilon^2$  and  $C_3 = 16(\lambda + 1)$  and  $C_2 = 1$ , the GP prior satisfies  $\Pi(A_n) \geq \exp(-nC_2 \epsilon_n^2)$ .*

Assumption 2.4 and 2.5 are straightforward to satisfy since the model risk function  $R(a, \theta)$  is bounded from above and below.

Now, suppose the variational family  $\mathcal{Q}_{GP}$  is a class of Gaussian distributions on  $\Theta$ , defined as  $\mathcal{N}(m_q, \mathcal{C}_q)$ ,  $m_q$  belongs to  $\Theta$  and  $\mathcal{C}_q$  is the covariance operator defined as  $\mathcal{C}_q = \mathcal{C}^{1/2}(I - S)\mathcal{C}^{1/2}$ ,

for any  $S$  which is a symmetric and Hilbert-Schmidt (HS) operator on  $\Theta$  (eigenvalues of HS operator are square summable). Note that  $S$  and  $m_q$  span the distributions in  $\mathcal{Q}_{GP}$ .

The following lemma verifies Assumption 3.1, for a specific sequence of distributions in  $\mathcal{Q}$ .

**Lemma B.13.** *For a given  $J \in \mathbb{N}$ , let  $\{Q_n\}$  be a sequence variational distribution such that  $Q_n$  is the measure induced by a GP,  $W_Q(\cdot) = \theta_0^J(y) + \sum_{j=1}^J \sum_{k=1}^{2^{jd}} \zeta_j^2 Z_{j,k} \vartheta_{j,k}(\cdot)$ , where  $\theta_0^J(\cdot) = \sum_{j=1}^J \sum_{k=1}^{2^{jd}} \theta_{0;j,k} \vartheta_{j,k}(\cdot)$  and  $\zeta_j^2 = \frac{\mu_j^2}{1+n\epsilon_n^2\tau_j^2}$ . Then for GP prior induced by  $W = \sum_{j=1}^J \sum_{k=1}^{2^{jd}} \mu_j Z_{j,k} \vartheta_{j,k}$  and  $\mu_j = 2^{-jd/2-j\alpha}$  for some  $\alpha > 0$ ,  $\|\theta_0\|_{\beta;\infty,\infty} < \infty$ , and  $\theta_0^J(y)$  lie in the Cameron-Martin space  $\text{Im}(\mathcal{C}^{1/2})$ , we have  $\frac{1}{n} \text{KL}(\mathcal{N}(\bar{\theta}_0^J, \mathcal{C}_q) \|\mathcal{N}(0, \mathcal{C})\|) + \frac{1}{n} \mathbb{E}_{Q_n} \text{KL}(P_0^n \| P_\theta^n) \leq C_9 \epsilon_n^2$ , where  $\epsilon_n$  is defined in 9 and  $C_9 := \max\left(\|\theta_0\|_{\beta,\infty,\infty}^2, \frac{2^{-2\alpha}-2^{-2J\alpha-2\alpha}}{1-2^{-2\alpha}}, 2^d/(2^d-1), C'\right)$ , where  $C'$  is a positive constant satisfying  $\|\theta_0(y) - \theta_0^J(y)\|_\infty^2 \leq C' 2^{-2J\beta}$ .*

Using the result above together with Proposition 3.2 implies that the RSVB posterior converges at the same rate as the true posterior, where the convergence rate of the true posterior is derived in [30, Theorem 4.5] for the binary GP classification problem with truncated wavelet GP prior. Finally, we use the results above to obtain bound on the optimality gap in values of the binary GP classification problem.

## C Proofs

### C.1 Alternative derivation of LCVB

We present the alternative derivation of LCVB. Consider the logarithm of the Bayes posterior risk,

$$\begin{aligned} \log \mathbb{E}_{\Pi(\theta|\tilde{X}_n)}[\exp(R(a, \theta))] &= \log \int_{\Theta} \exp(R(a, \theta)) d\Pi(\theta|\tilde{X}_n) \\ &= \log \int_{\Theta} \frac{dQ(\theta)}{dQ(\theta)} \exp(R(a, \theta)) d\Pi(\theta|\tilde{X}_n) \\ &\geq - \int_{\Theta} dQ(\theta) \log \frac{dQ(\theta)}{\exp(R(a, \theta)) d\Pi(\theta|\tilde{X}_n)} =: \mathcal{F}(a; Q(\cdot), \tilde{X}_n) \end{aligned} \quad (17)$$

where the inequality follows from an application of Jensen's inequality (since, without loss of generality,  $\exp(R(a, \theta)) > 0$  for all  $a \in \mathcal{A}$  and  $\theta \in \Theta$ ), and  $Q \in \mathcal{Q}$ . Then, it follows that

$$\begin{aligned} \min_{a \in \mathcal{A}} \log \mathbb{E}_{\Pi(\theta|\tilde{X}_n)}[\exp(R(a, \theta))] &\geq \min_{a \in \mathcal{A}} \max_{q \in \mathcal{Q}} \mathcal{F}(a; Q(\theta), \tilde{X}_n) \\ &= \min_{a \in \mathcal{A}} \max_{q \in \mathcal{Q}} -\text{KL}(Q(\theta) \|\Pi(\theta|\tilde{X}_n)\rangle) + \int_{\Theta} R(a, \theta) dQ(\theta). \end{aligned} \quad (18)$$

### C.2 Proof of Theorem 3.1

We prove our main result after a series of important lemmas. For brevity we denote  $\mathcal{LR}_n(\theta, \theta_0) = \frac{p(\tilde{X}_n|\theta)}{p(\tilde{X}_n|\theta_0)}$ .

**Lemma C.1.** *For any  $a' \in \mathcal{A}$ ,  $\gamma > 0$ , and  $\zeta > 0$ ,*

$$\begin{aligned} &\mathbb{E}_{P_0^n} \left[ \zeta \int_{\Theta} L_n(\theta, \theta_0) dQ_{a',\gamma}^*(\theta|\tilde{X}_n) \right] \\ &\leq \log \mathbb{E}_{P_0^n} \left[ \int_{\Theta} e^{\zeta L_n(\theta, \theta_0)} \frac{e^{\gamma R(a', \theta)} \mathcal{LR}_n(\theta, \theta_0) d\Pi(\theta)}{\int_{\Theta} e^{\gamma R(a', \theta)} \mathcal{LR}_n(\theta, \theta_0) d\Pi(\theta)} \right] + \inf_{Q \in \mathcal{Q}} \mathbb{E}_{P_0^n} \left[ \text{KL}(Q(\theta) \|\Pi(\theta|\tilde{X}_n)\rangle) \right. \\ &\quad \left. - \gamma \inf_{a \in \mathcal{A}} \mathbb{E}_Q[R(a, \theta)] \right] + \log \mathbb{E}_{P_0^n} \left[ \int_{\Theta} e^{\gamma R(a', \theta)} \frac{\mathcal{LR}_n(\theta, \theta_0) d\Pi(\theta)}{\int_{\Theta} \mathcal{LR}_n(\theta, \theta_0) d\Pi(\theta)} \right]. \end{aligned} \quad (19)$$

*Proof.* For any fixed  $a' \in \mathcal{A}$ ,  $\gamma > 0$ , and  $\zeta > 0$ , and using the fact that KL is non-negative, observe that the integral in the LHS of equation (19) satisfies,

$$\begin{aligned}
\zeta \mathbb{E}_{Q_{a',\gamma}^*(\theta|\tilde{X}_n)} [L_n(\theta, \theta_0)] &\leq \mathbb{E}_{Q_{a',\gamma}^*(\theta|\tilde{X}_n)} \left[ \log e^{\zeta L_n(\theta, \theta_0)} \right] \\
&\quad + \text{KL} \left( dQ_{a',\gamma}^*(\theta|\tilde{X}_n) \left\| \frac{e^{\zeta L_n(\theta, \theta_0)} e^{\gamma R(a', \theta)} d\Pi(\theta|\tilde{X}_n)}{\int_{\Theta} e^{\zeta L_n(\theta, \theta_0)} e^{\gamma R(a', \theta)} d\Pi(\theta|\tilde{X}_n)} \right\| \right) \\
&= \mathbb{E}_{Q_{a',\gamma}^*(\theta|\tilde{X}_n)} \left[ \log e^{\zeta L_n(\theta, \theta_0)} \right] + \log \mathbb{E}_{\Pi_n} \left[ e^{\zeta L_n(\theta, \theta_0)} e^{\gamma R(a', \theta)} \right] \\
&\quad + \mathbb{E}_{Q_{a',\gamma}^*(\theta|\tilde{X}_n)} \left[ \log \frac{dQ_{a',\gamma}^*(\theta|\tilde{X}_n)}{e^{\zeta L_n(\theta, \theta_0)} e^{\gamma R(a', \theta)} d\Pi(\theta|\tilde{X}_n)} \right] \\
&= \log \mathbb{E}_{\Pi_n} \left[ e^{\zeta L_n(\theta, \theta_0)} e^{\gamma R(a', \theta)} \right] + \mathbb{E}_{Q_{a',\gamma}^*(\theta|\tilde{X}_n)} \left[ \log \frac{dQ_{a',\gamma}^*(\theta|\tilde{X}_n)}{e^{\gamma R(a', \theta)} d\Pi(\theta|\tilde{X}_n)} \right].
\end{aligned}$$

Next, using the definition of  $Q_{a',\gamma}^*(\theta|\tilde{X}_n)$  in the second term of last equality, for any other  $Q(\cdot) \in \mathcal{Q}$

$$\zeta \mathbb{E}_{Q_{a',\gamma}^*(\theta|\tilde{X}_n)} [L_n(\theta, \theta_0)] \leq \log \mathbb{E}_{\Pi_n} \left[ e^{\zeta L_n(\theta, \theta_0)} e^{\gamma R(a', \theta)} \right] + \mathbb{E}_Q \left[ \log \frac{dQ(\theta)}{e^{\gamma R(a', \theta)} d\Pi(\theta|\tilde{X}_n)} \right].$$

Finally, it follows from the definition of the posterior distribution that

$$\begin{aligned}
&\zeta \mathbb{E}_{Q_{a',\gamma}^*(\theta|\tilde{X}_n)} [L_n(\theta, \theta_0)] \\
&\leq \log \int_{\Theta} e^{\zeta L_n(\theta, \theta_0)} e^{\gamma R(a', \theta)} \frac{\mathcal{LR}_n(\theta, \theta_0) d\Pi(\theta)}{\int_{\Theta} \mathcal{LR}_n(\theta, \theta_0) d\Pi(\theta)} + \mathbb{E}_Q \left[ \log \frac{dQ(\theta)}{e^{\gamma R(a', \theta)} d\Pi(\theta|\tilde{X}_n)} \right], \\
&= \log \int_{\Theta} e^{\zeta L_n(\theta, \theta_0)} \frac{e^{\gamma R(a', \theta)} \mathcal{LR}_n(\theta, \theta_0) d\Pi(\theta)}{\int_{\Theta} e^{\gamma R(a', \theta)} \mathcal{LR}_n(\theta, \theta_0) d\Pi(\theta)} + \mathbb{E}_Q \left[ \log \frac{dQ(\theta)}{e^{\gamma R(a', \theta)} d\Pi(\theta|\tilde{X}_n)} \right] \\
&\quad + \log \int_{\Theta} e^{\gamma R(a', \theta)} \frac{\mathcal{LR}_n(\theta, \theta_0) d\Pi(\theta)}{\int_{\Theta} \mathcal{LR}_n(\theta, \theta_0) d\Pi(\theta)}, \tag{20}
\end{aligned}$$

where the last equality follows from adding and subtracting  $\log \mathbb{E}_{\Pi} \left[ e^{\gamma R(a', \theta)} \mathcal{LR}_n(\theta, \theta_0) \right]$ . Now taking expectation on either side of equation (20) and using Jensen's inequality on the first and the last term in the RHS yields

$$\begin{aligned}
&\mathbb{E}_{P_0^n} \left[ \zeta \mathbb{E}_{Q_{a',\gamma}^*(\theta|\tilde{X}_n)} [L_n(\theta, \theta_0)] \right] \\
&\leq \log \mathbb{E}_{P_0^n} \left[ \int_{\Theta} e^{\zeta L_n(\theta, \theta_0)} \frac{e^{\gamma R(a', \theta)} \mathcal{LR}_n(\theta, \theta_0) d\Pi(\theta)}{\int_{\Theta} e^{\gamma R(a', \theta)} \mathcal{LR}_n(\theta, \theta_0) d\Pi(\theta)} \right] + \inf_{Q \in \mathcal{Q}} \mathbb{E}_{P_0^n} \left[ \text{KL}(Q \| \Pi_n) \right] \\
&\quad - \gamma \inf_{a \in \mathcal{A}} \mathbb{E}_Q [R(a, \theta)] + \log \mathbb{E}_{P_0^n} \left[ \int_{\Theta} e^{\gamma R(a', \theta)} \frac{\mathcal{LR}_n(\theta, \theta_0) d\Pi(\theta)}{\int_{\Theta} \mathcal{LR}_n(\theta, \theta_0) d\Pi(\theta)} \right], \tag{21}
\end{aligned}$$

where in the second term in RHS of (20), we first take infimum over all  $a \in \mathcal{A}$  which upper bounds the second term in (20) and then take infimum over all  $Q \in \mathcal{Q}$ , since the LHS does not depend on  $Q$ .  $\square$

Next, we state a technical result that is important in proving our next lemma.

**Lemma C.2** (Lemma 6.4 of [34]). *Suppose random variable  $X$  satisfies*

$$\mathbb{P}(X \geq t) \leq c_1 \exp(-c_2 t),$$

*for all  $t \geq t_0 > 0$ . Then for any  $0 < \beta \leq c_2/2$ ,*

$$\mathbb{E}[\exp(\beta X)] \leq \exp(\beta t_0) + c_1.$$

*Proof.* Refer Lemma 6.4 of [34].  $\square$

In the following result, we bound the first term on the RHS of equation (19). The arguments in the proof are essentially similar to Lemma 6.3 in [34]

**Lemma C.3.** *Under Assumptions 2.1, 2.2, 2.3, 2.4, and 2.5 and for  $\min(C, C_4(\gamma) + C_5(\gamma)) > C_2 + C_3 + C_4(\gamma) + 2$  and any  $\epsilon \geq \epsilon_n$ ,*

$$\mathbb{E}_{P_0^n} \left[ \int_{\Theta} e^{\zeta L_n(\theta, \theta_0)} \frac{e^{\gamma R(a', \theta)} \mathcal{L}\mathcal{R}_n(\theta, \theta_0) d\Pi(\theta)}{\int_{\Theta} e^{\gamma R(a', \theta)} \mathcal{L}\mathcal{R}_n(\theta, \theta_0) d\Pi(\theta)} \right] \leq e^{\zeta C_1 n \epsilon^2} + (1 + C_0 + 3W^{-\gamma}), \quad (22)$$

for  $0 < \zeta \leq C_{10}/2$ , where  $C_{10} = \min\{\lambda, C, 1\}/C_1$  for any  $\lambda > 0$ .

*Proof.* First define the set

$$B_n := \left\{ \tilde{X}_n : \int_{\Theta} \mathcal{L}\mathcal{R}_n(\theta, \theta_0) d\Pi(\theta) \geq e^{-(1+C_3)n\epsilon^2} \Pi(A_n) \right\}, \quad (23)$$

where set  $A_n$  is defined in Assumption 2.3. We demonstrate that, under Assumption 2.3,  $P_0^n(B_n^c)$  is bounded above by an exponentially decreasing(in  $n$ ) term. Note that for  $A_n$  as defined in Assumption 2.3:

$$\begin{aligned} \mathbb{P}_0^n \left( \frac{1}{\Pi(A_n)} \int_{\Theta} \mathcal{L}\mathcal{R}_n(\theta, \theta_0) d\Pi(\theta) \leq e^{-(1+C_3)n\epsilon^2} \right) \\ \leq \mathbb{P}_0^n \left( \frac{1}{\Pi(A_n)} \int_{\Theta \cap A_n} \mathcal{L}\mathcal{R}_n(\theta, \theta_0) d\Pi(\theta) \leq e^{-(1+C_3)n\epsilon^2} \right). \end{aligned} \quad (24)$$

Let  $d\tilde{\Pi}(\theta) := \frac{\mathbb{1}_{\{\Theta \cap A_n\}}(\theta)}{\Pi(A_n)} d\Pi(\theta)$ , and use this in (24) for any  $\lambda > 0$  to obtain,

$$\mathbb{P}_0^n \left( \int_{\Theta} \mathcal{L}\mathcal{R}_n(\theta, \theta_0) d\tilde{\Pi}(\theta) \leq e^{-(1+C_3)n\epsilon^2} \right) = \mathbb{P}_0^n \left( \left[ \int_{\Theta} \mathcal{L}\mathcal{R}_n(\theta, \theta_0) d\tilde{\Pi}(\theta) \right]^{-\lambda} \geq e^{(1+C_3)\lambda n\epsilon^2} \right).$$

Then, using the Markov's inequality in the last equality above, we have

$$\begin{aligned} \mathbb{P}_0^n \left( \int_{\Theta} \mathcal{L}\mathcal{R}_n(\theta, \theta_0) d\tilde{\Pi}(\theta) \leq e^{-(1+C_3)n\epsilon^2} \right) &\leq e^{-(1+C_3)\lambda n\epsilon^2} \mathbb{E}_{P_0^n} \left( \left[ \int_{\Theta} \mathcal{L}\mathcal{R}_n(\theta, \theta_0) d\tilde{\Pi}(\theta) \right]^{-\lambda} \right) \\ &\leq e^{-(1+C_3)\lambda n\epsilon^2} \left[ \int_{\Theta} \mathbb{E}_{P_0^n} \left( [\mathcal{L}\mathcal{R}_n(\theta, \theta_0)]^{-\lambda} \right) d\tilde{\Pi}(\theta) \right] \\ &= e^{-(1+C_3)\lambda n\epsilon^2} \left[ \int_{\Theta} \exp(\lambda D_{\lambda+1}(P_0^n \| P_{\theta}^n)) d\tilde{\Pi}(\theta) \right] \\ &\leq e^{-(1+C_3)\lambda n\epsilon^2} e^{\lambda C_3 n \epsilon_n^2} \leq \epsilon^{-\lambda n \epsilon^2}, \end{aligned} \quad (25)$$

where the second inequality follows from first applying Jensen's inequality (on the term inside  $[\cdot]$ ) and then using Fubini's theorem, and the penultimate inequality follows from Assumption 2.3 and the definition of  $\tilde{\Pi}(\theta)$ .

Next, define the set  $K_n := \{\theta \in \Theta : L_n(\theta, \theta_0) > C_1 n \epsilon^2\}$ . Notice that set  $K_n$  is the set of alternate hypothesis as defined in Assumption 2.1. We bound the calibrated posterior probability of this set  $K_n$  to get a bound on the first term in the RHS of equation (19). Recall the sequence of test function  $\{\phi_{n,\epsilon}\}$  from Assumption 2.1. Observe that

$$\begin{aligned} \mathbb{E}_{P_0^n} \left[ \frac{\int_{K_n} e^{\gamma R(a', \theta)} \mathcal{L}\mathcal{R}_n(\theta, \theta_0) d\Pi(\theta)}{\int_{\Theta} e^{\gamma R(a', \theta)} \mathcal{L}\mathcal{R}_n(\theta, \theta_0) d\Pi(\theta)} \right] \\ = \mathbb{E}_{P_0^n} \left[ \left( \phi_{n,\epsilon} + 1 - \phi_{n,\epsilon} \right) \frac{\int_{K_n} e^{\gamma R(a', \theta)} \mathcal{L}\mathcal{R}_n(\theta, \theta_0) d\Pi(\theta)}{\int_{\Theta} e^{\gamma R(a', \theta)} \mathcal{L}\mathcal{R}_n(\theta, \theta_0) d\Pi(\theta)} \right] \\ \leq \mathbb{E}_{P_0^n} [\phi_{n,\epsilon}] + \mathbb{E}_{P_0^n} [(1 - \phi_{n,\epsilon}) \mathbb{1}_{B_n^c}] \\ + \mathbb{E}_{P_0^n} \left[ \left( 1 - \phi_{n,\epsilon} \right) \mathbb{1}_{B_n} \frac{\int_{K_n} e^{\gamma R(a', \theta)} \mathcal{L}\mathcal{R}_n(\theta, \theta_0) d\Pi(\theta)}{\int_{\Theta} e^{\gamma R(a', \theta)} \mathcal{L}\mathcal{R}_n(\theta, \theta_0) d\Pi(\theta)} \right] \\ \leq \mathbb{E}_{P_0^n} \phi_{n,\epsilon} + \mathbb{E}_{P_0^n} [\mathbb{1}_{B_n^c}] + \mathbb{E}_{P_0^n} \left[ \left( 1 - \phi_{n,\epsilon} \right) \mathbb{1}_{B_n} \frac{\int_{K_n} e^{\gamma R(a', \theta)} \mathcal{L}\mathcal{R}_n(\theta, \theta_0) d\Pi(\theta)}{\int_{\Theta} e^{\gamma R(a', \theta)} \mathcal{L}\mathcal{R}_n(\theta, \theta_0) d\Pi(\theta)} \right], \end{aligned} \quad (26)$$

where in the second inequality, we first divide the second term over set  $B_n$  and its complement and then use the fact that  $\frac{\int_{K_n} e^{\gamma R(a', \theta)} \mathcal{LR}_n(\theta, \theta_0) d\Pi(\theta)}{\int_{\Theta} e^{\gamma R(a', \theta)} \mathcal{LR}_n(\theta, \theta_0) d\Pi(\theta)} \leq 1$ . The third inequality is due the fact that  $\phi_{n, \epsilon} \in [0, 1]$ . Next, using Assumption 2.3 and 2.5 observe that on set  $B_n$

$$\begin{aligned} \int_{\Theta} e^{\gamma R(a', \theta)} \mathcal{LR}_n(\theta, \theta_0) d\Pi(\theta) &\geq W^\gamma \int_{\Theta} \mathcal{LR}_n(\theta, \theta_0) d\Pi(\theta) \\ &\geq W^\gamma e^{-(1+C_2+C_3)n\epsilon^2} \geq W^\gamma e^{-(1+C_2+C_3)n\epsilon^2}. \end{aligned}$$

Substituting the equation above in the third term of equation (26), we obtain

$$\begin{aligned} &\mathbb{E}_{P_0^n} \left[ (1 - \phi_{n, \epsilon}) \mathbb{1}_{B_n} \frac{\int_{K_n} e^{\gamma R(a', \theta)} \mathcal{LR}_n(\theta, \theta_0) d\Pi(\theta)}{\int_{\Theta} e^{\gamma R(a', \theta)} \mathcal{LR}_n(\theta, \theta_0) d\Pi(\theta)} \right] \\ &\leq W^{-\gamma} e^{(1+C_2+C_3)n\epsilon^2} \mathbb{E}_{P_0^n} \left[ (1 - \phi_{n, \epsilon}) \mathbb{1}_{B_n} \int_{K_n} e^{\gamma R(a', \theta)} \mathcal{LR}_n(\theta, \theta_0) d\Pi(\theta) \right] \\ &\leq W^{-\gamma} e^{(1+C_2+C_3)n\epsilon^2} \mathbb{E}_{P_0^n} \left[ (1 - \phi_{n, \epsilon}) \int_{K_n} e^{\gamma R(a', \theta)} \mathcal{LR}_n(\theta, \theta_0) d\Pi(\theta) \right]. \quad (\star) \end{aligned}$$

Now using Fubini's theorem observe that,

$$\begin{aligned} (\star) &= W^{-\gamma} e^{(1+C_2+C_3)n\epsilon^2} \int_{K_n} e^{\gamma R(a', \theta)} \mathbb{E}_{P_\theta^n} [(1 - \phi_{n, \epsilon})] d\Pi(\theta) \\ &\leq W^{-\gamma} e^{(1+C_2+C_3+C_4(\gamma))n\epsilon^2} \left[ \int_{K_n \cap \{e^{\gamma R(a', \theta)} \leq e^{C_4(\gamma)n\epsilon^2}\}} \mathbb{E}_{P_\theta^n} [(1 - \phi_{n, \epsilon})] d\Pi(\theta) \right. \\ &\quad \left. + e^{-C_4(\gamma)n\epsilon^2} \int_{K_n \cap \{e^{\gamma R(a', \theta)} > e^{C_4(\gamma)n\epsilon^2}\}} e^{\gamma R(a', \theta)} d\Pi(\theta) \right], \end{aligned}$$

where in the last inequality, we first divide the integral over set  $\{\theta \in \Theta : e^{\gamma R(a', \theta)} \leq e^{C_4(\gamma)n\epsilon^2}\}$  and its complement and then use the upper bound on  $e^{\gamma R(a', \theta)}$  in the first integral. Now, it follows that

$$\begin{aligned} (\star) &\leq W^{-\gamma} e^{(1+C_2+C_3+C_4(\gamma))n\epsilon^2} \left[ \int_{K_n} \mathbb{E}_{P_\theta^n} [(1 - \phi_{n, \epsilon})] d\Pi(\theta) \right. \\ &\quad \left. + e^{-C_4(\gamma)n\epsilon^2} \int_{\{e^{\gamma R(a', \theta)} > e^{C_4(\gamma)n\epsilon^2}\}} e^{\gamma R(a', \theta)} d\Pi(\theta) \right] \\ &= W^{-\gamma} e^{(1+C_2+C_3+C_4(\gamma))n\epsilon^2} \left[ \int_{K_n \cap \Theta_n(\epsilon)} \mathbb{E}_{P_\theta^n} [(1 - \phi_{n, \epsilon})] d\Pi(\theta) \right. \\ &\quad \left. + \int_{K_n \cap \Theta_n(\epsilon)^c} \mathbb{E}_{P_\theta^n} [(1 - \phi_{n, \epsilon})] d\Pi(\theta) + e^{-C_4(\gamma)n\epsilon^2} \int_{\{e^{\gamma R(a', \theta)} > e^{C_4(\gamma)n\epsilon^2}\}} e^{\gamma R(a', \theta)} d\Pi(\theta) \right] \\ &\leq W^{-\gamma} e^{(1+C_2+C_3+C_4(\gamma))n\epsilon^2} \left[ \int_{K_n \cap \Theta_n(\epsilon)} \mathbb{E}_{P_\theta^n} [(1 - \phi_{n, \epsilon})] d\Pi(\theta) + \Pi(\Theta_n(\epsilon)^c) \right. \\ &\quad \left. + e^{-C_4(\gamma)n\epsilon^2} \int_{\{e^{\gamma R(a', \theta)} > e^{C_4(\gamma)n\epsilon^2}\}} e^{\gamma R(a', \theta)} d\Pi(\theta) \right], \end{aligned}$$

where the second equality is obtained by dividing the first integral on set  $\Theta_n(\epsilon)$  and its complement, and the second inequality is due the fact that  $\phi_{n, \epsilon} \in [0, 1]$ . Now, using the equation above and Assumption 2.1, 2.2, and 2.4 observe that

$$\begin{aligned} &\mathbb{E}_{P_0^n} \left[ (1 - \phi_{n, \epsilon}) \mathbb{1}_{B_n} \frac{\int_{K_n} e^{\gamma R(a', \theta)} \mathcal{LR}_n(\theta, \theta_0) d\Pi(\theta)}{\int_{\Theta} e^{\gamma R(a', \theta)} \mathcal{LR}_n(\theta, \theta_0) d\Pi(\theta)} \right] \\ &\leq W^{-\gamma} e^{(1+C_2+C_3+C_4(\gamma))n\epsilon^2} \left[ 2e^{-Cn\epsilon^2} + e^{-(C_5(\gamma)+C_4(\gamma))n\epsilon^2} \right]. \end{aligned}$$

Hence, choosing  $C, C_2, C_3, C_4(\gamma)$  and  $C_5(\gamma)$  such that  $-1 > 1+C_2+C_3+C_4(\gamma) - \min(C, (C_4(\gamma)+C_5(\gamma)))$  implies

$$\mathbb{E}_{P_0^n} \left[ (1 - \phi_{n,\epsilon}) \mathbb{I}_{B_n} \frac{\int_{K_n} e^{\gamma R(a',\theta)} \mathcal{L}\mathcal{R}_n(\theta, \theta_0) d\Pi(\theta)}{\int_{\Theta} e^{\gamma R(a',\theta)} \mathcal{L}\mathcal{R}_n(\theta, \theta_0) d\Pi(\theta)} \right] \leq 3W^{-\gamma} e^{-n\epsilon^2}. \quad (27)$$

By Assumption 2.1, we have

$$\mathbb{E}_{P_0^n} \phi_{n,\epsilon} \leq C_0 e^{-Cn\epsilon^2}. \quad (28)$$

Therefore, substituting equation (25), equation (27), and (28) into (26), we obtain

$$\mathbb{E}_{P_0^n} \left[ \frac{\int_{K_n} e^{\gamma R(a',\theta)} \mathcal{L}\mathcal{R}_n(\theta, \theta_0) d\Pi(\theta)}{\int_{\Theta} e^{\gamma R(a',\theta)} \mathcal{L}\mathcal{R}_n(\theta, \theta_0) d\Pi(\theta)} \right] \leq (1 + C_0 + 3W^{-\gamma}) e^{-C_{10}C_1 n\epsilon^2}, \quad (29)$$

where  $C_{10} = \min\{\lambda, C, 1\}/C_1$ . Using Fubini's theorem, observe that the LHS in the equation (29) can be expressed as  $\mu(K_n)$ , where

$$d\mu(\theta) = \mathbb{E}_{P_0^n} \left[ \frac{\mathcal{L}\mathcal{R}_n(\theta, \theta_0)}{\int_{\Theta} e^{\gamma R(a',\theta)} \mathcal{L}\mathcal{R}_n(\theta, \theta_0) d\Pi(\theta)} \right] \Pi(\theta) e^{\gamma R(a',\theta)} d\theta.$$

Next, recall that the set  $K_n = \{\theta \in \Theta : L_n(\theta, \theta_0) > C_1 n\epsilon^2\}$ . Applying Lemma C.2 above with  $X = L_n(\theta, \theta_0)$ ,  $c_1 = (1 + C_0 + 3W^{-\gamma})$ ,  $c_2 = C_{10}$ ,  $t_0 = C_1 n\epsilon_n^2$ , and for  $0 < \zeta \leq C_{10}/2$ , we obtain

$$\mathbb{E}_{P_0^n} \left[ \int_{\Theta} e^{\zeta L_n(\theta, \theta_0)} \frac{e^{\gamma R(a',\theta)} \mathcal{L}\mathcal{R}_n(\theta, \theta_0) \Pi(\theta)}{\int_{\Theta} e^{\gamma R(a',\theta)} \mathcal{L}\mathcal{R}_n(\theta, \theta_0) d\Pi(\theta)} d\theta \right] \leq e^{\zeta C_1 n\epsilon_n^2} + (1 + C_0 + 3W^{-\gamma}). \quad (30)$$

□

Further, we have another technical lemma, that will be crucial in proving the subsequent lemma that upper bounds the last term in the equation (19).

**Lemma C.4.** *Suppose a positive random variable  $X$  satisfies*

$$\mathbb{P}(X \geq e^t) \leq c_1 \exp(-(c_2 + 1)t),$$

*for all  $t \geq t_0 > 0$ ,  $c_1 > 0$ , and  $c_2 > 0$ . Then,*

$$\mathbb{E}[X] \leq \exp(t_0) + \frac{c_1}{c_2}.$$

*Proof.* For any  $Z_0 > 1$ ,

$$\begin{aligned} \mathbb{E}[X] &\leq Z_0 + \int_{Z_0}^{\infty} \mathbb{P}(X \geq x) dx \\ &= Z_0 + \int_{\ln Z_0}^{\infty} \mathbb{P}(X \geq e^y) e^y dy \leq Z_0 + c_1 \int_{\ln Z_0}^{\infty} \exp(-c_2 y) dy. \end{aligned}$$

Therefore, choosing  $Z_0 = \exp(t_0)$ ,

$$\mathbb{E}[X] \leq \exp(t_0) + \frac{c_1}{c_2} \exp(-c_2 t_0) \leq \exp(t_0) + \frac{c_1}{c_2}.$$

□

Next, we establish the following bound on the last term in equation (19).

**Lemma C.5.** *Under Assumptions 2.1, 2.2, 2.3, 2.4, 2.5, and for  $C_5(\gamma) > C_2 + C_3 + 2$ ,*

$$\mathbb{E}_{P_0^n} \left[ \int_{\Theta} \frac{e^{\gamma R(a',\theta)} \mathcal{L}\mathcal{R}_n(\theta, \theta_0) d\Pi(\theta)}{\int_{\Theta} \mathcal{L}\mathcal{R}_n(\theta, \theta_0) d\Pi(\theta)} \right] \leq e^{C_4(\gamma) n\epsilon_n^2} + 2C_4(\gamma). \quad (31)$$

*for any  $\lambda \geq 1 + C_4(\gamma)$ .*

*Proof.* Define the set

$$M_n := \{\theta \in \Theta : e^{\gamma R(a', \theta)} > e^{C_4(\gamma)n\epsilon^2}\}. \quad (32)$$

Using the set  $B_n$  in equation (23), observe that the measure of the set  $M_n$ , under the posterior distribution satisfies,

$$\mathbb{E}_{P_0^n} \left[ \frac{\int_{M_n} \mathcal{LR}_n(\theta, \theta_0) d\Pi(\theta)}{\int_{\Theta} \mathcal{LR}_n(\theta, \theta_0) d\Pi(\theta)} \right] \leq \mathbb{E}_{P_0^n} [\mathbb{1}_{B_n^c}] + \mathbb{E}_{P_0^n} \left[ \mathbb{1}_{B_n} \frac{\int_{M_n} \mathcal{LR}_n(\theta, \theta_0) d\Pi(\theta)}{\int_{\Theta} \mathcal{LR}_n(\theta, \theta_0) d\Pi(\theta)} \right]. \quad (33)$$

Now, the second term of equation (33) can be bounded as follows: recall Assumption 2.3 and the definition of set  $B_n$ , both together imply that,

$$\begin{aligned} \mathbb{E}_{P_0^n} \left[ \mathbb{1}_{B_n} \frac{\int_{M_n} \mathcal{LR}_n(\theta, \theta_0) d\Pi(\theta)}{\int_{\Theta} \mathcal{LR}_n(\theta, \theta_0) d\Pi(\theta)} \right] &\leq e^{(1+C_2+C_3)n\epsilon^2} \mathbb{E}_{P_0^n} \left[ \mathbb{1}_{B_n} \int_{M_n} \mathcal{LR}_n(\theta, \theta_0) d\Pi(\theta) \right] \\ &\leq e^{(1+C_2+C_3)n\epsilon^2} \mathbb{E}_{P_0^n} \left[ \int_{M_n} \mathcal{LR}_n(\theta, \theta_0) d\Pi(\theta) \right]. \quad (\star\star) \end{aligned}$$

Then, using Fubini's Theorem  $(\star\star) = e^{(1+C_2+C_3)n\epsilon^2} \Pi(M_n)$ . Next, using the definition of set  $M_n$  and then Assumption 2.4, we obtain

$$\begin{aligned} \mathbb{E}_{P_0^n} \left[ \mathbb{1}_{B_n} \frac{\int_{M_n} \mathcal{LR}_n(\theta, \theta_0) d\Pi(\theta)}{\int_{\Theta} \mathcal{LR}_n(\theta, \theta_0) d\Pi(\theta)} \right] &\leq e^{(1+C_2+C_3)n\epsilon^2} e^{-C_4(\gamma)n\epsilon^2} \int_{M_n} e^{\gamma R(a', \theta)} d\Pi(\theta) \\ &\leq e^{(1+C_2+C_3)n\epsilon^2} e^{-C_4(\gamma)n\epsilon^2} e^{-C_5(\gamma)n\epsilon^2}, \end{aligned}$$

Hence, choosing the constants  $C_2, C_3, C_4(\gamma)$  and  $C_5(\gamma)$  such that  $-1 > 1 + C_2 + C_3 - C_5(\gamma)$  implies

$$\mathbb{E}_{P_0^n} \left[ \mathbb{1}_{B_n} \frac{\int_{M_n} \mathcal{LR}_n(\theta, \theta_0) d\Pi(\theta)}{\int_{\Theta} \mathcal{LR}_n(\theta, \theta_0) d\Pi(\theta)} \right] \leq e^{-(1+C_4(\gamma))n\epsilon^2} \quad (34)$$

Therefore, substituting (25) and (34) into (33)

$$\mathbb{E}_{P_0^n} \left[ \frac{\int_{M_n} \mathcal{LR}_n(\theta, \theta_0) d\Pi(\theta)}{\int_{\Theta} \mathcal{LR}_n(\theta, \theta_0) d\Pi(\theta)} \right] \leq 2e^{-C_4(\gamma)(C_{11}(\gamma)+1)n\epsilon^2}, \quad (35)$$

where  $C_{11}(\gamma) = \min\{\lambda, 1 + C_4(\gamma)\}/C_4(\gamma) - 1$ . Using Fubini's theorem, observe that the RHS in (35) can be expressed as  $\nu(M_n)$ , where the measure

$$d\nu(\theta) = \mathbb{E}_{P_0^n} \left[ \frac{\mathcal{LR}_n(\theta, \theta_0)}{\int_{\Theta} \mathcal{LR}_n(\theta, \theta_0) d\Pi(\theta)} \right] d\Pi(\theta).$$

Applying Lemma C.4 for  $X = e^{\gamma R(a', \theta)}$ ,  $c_1 = 2$ ,  $c_2 = C_{11}(\gamma)$ ,  $t_0 = C_4(\gamma)n\epsilon_n^2$  and  $\lambda \geq 1 + C_4(\gamma)$ , we obtain

$$\mathbb{E}_{P_0^n} \left[ \frac{\int_{\Theta} e^{\gamma R(a', \theta)} \mathcal{LR}_n(\theta, \theta_0) d\Pi(\theta)}{\int_{\Theta} \mathcal{LR}_n(\theta, \theta_0) d\Pi(\theta)} \right] \leq e^{C_4(\gamma)n\epsilon_n^2} + \frac{2}{C_{11}(\gamma)} \leq e^{C_4(\gamma)n\epsilon_n^2} + 2C_4(\gamma). \quad (36)$$

□

*Proof.* Proof of Theorem 3.1: Finally, recall (19),

$$\begin{aligned} &\zeta \mathbb{E}_{P_0^n} \left[ \int_{\Theta} L_n(\theta, \theta_0) dQ_{a', \gamma}^*(\theta | \tilde{X}_n) \right] \\ &\leq \log \mathbb{E}_{P_0^n} \left[ \int_{\Theta} e^{\zeta L_n(\theta, \theta_0)} \frac{e^{\gamma R(a', \theta)} \mathcal{LR}_n(\theta, \theta_0) d\Pi(\theta)}{\int_{\Theta} e^{\gamma R(a', \theta)} \mathcal{LR}_n(\theta, \theta_0) d\Pi(\theta)} \right] + \inf_{Q \in \mathcal{Q}} \mathbb{E}_{P_0^n} \left[ \text{KL}(Q \| \Pi_n) \right. \\ &\quad \left. - \gamma \inf_{a \in \mathcal{A}} \mathbb{E}_Q[R(a, \theta)] \right] + \log \mathbb{E}_{P_0^n} \left[ \int_{\Theta} e^{\gamma R(a', \theta)} \frac{\mathcal{LR}_n(\theta, \theta_0) d\Pi(\theta)}{\int_{\Theta} \mathcal{LR}_n(\theta, \theta_0) d\Pi(\theta)} \right]. \quad (37) \end{aligned}$$

Substituting (31) and (22) into the equation above and then using the definition of  $\eta_n^R(\gamma)$ , we get

$$\begin{aligned} & \mathbb{E}_{P_0^n} \left[ \int_{\Theta} L_n(\theta, \theta_0) dQ_{a', \gamma}^*(\theta | \tilde{X}_n) \right] \\ & \leq \frac{1}{\zeta} \left\{ \log(e^{\zeta C_1 n \epsilon_n^2} + (1 + C_0 + 3W^{-\gamma})) + \log(e^{C_4(\gamma) n \epsilon_n^2} + 2C_4(\gamma)) + n\eta_n^R(\gamma) \right\} \\ & \leq \left( C_1 + \frac{1}{\zeta} C_4(\gamma) \right) n \epsilon_n^2 + \frac{1}{\zeta} n \eta_n^R(\gamma) + \frac{(1 + C_0 + 3W^{-\gamma})e^{(-\zeta C_1 n \epsilon_n^2)} + 2C_4(\gamma)e^{-C_4(\gamma) n \epsilon_n^2}}{\zeta}, \end{aligned}$$

where the last inequality uses the fact that  $\log x \leq x - 1$ . Choosing  $\zeta = C_{10}/2 = \frac{\min(C, \lambda, 1)}{2C_1}$ ,

$$\begin{aligned} & \mathbb{E}_{P_0^n} \left[ \int_{\Theta} L_n(\theta, \theta_0) dQ_{a', \gamma}^*(\theta | \tilde{X}_n) \right] \\ & \leq M(\gamma) n (\epsilon_n^2) + M' n \eta_n^R(\gamma) + \frac{2(1 + C_0 + 3W^{-\gamma})e^{(-\frac{C_{10}}{2} n \epsilon_n^2)} + 4C_4(\gamma)e^{-C_4(\gamma) n \epsilon_n^2}}{C_{10}} \quad (38) \end{aligned}$$

where  $M(\gamma) = C_1 + \frac{1}{\zeta} C_4(\gamma)$  and  $M' = \frac{1}{\zeta}$  depend on  $C, C_1, C_4(\gamma), W$  and  $\lambda$ . Since the last two terms in (38) decrease and the first term increases as  $n$  increases, we can choose  $M'$  large enough, such that for all  $n \geq 1$

$$M' n \eta_n^R(\gamma) > \frac{2(1 + C_0 + 3W^{-\gamma})}{C_{10}} + \frac{4C_4(\gamma)}{C_{10}},$$

and therefore for  $M = 2M'$ ,

$$\mathbb{E}_{P_0^n} \left[ \int_{\Theta} L_n(\theta, \theta_0) dQ_{a', \gamma}^*(\theta | \tilde{X}_n) \right] \leq M(\gamma) n (\epsilon_n^2) + M n \eta_n^R(\gamma). \quad (39)$$

Also, observe that the LHS in the above equation is always positive, therefore  $M(\gamma) \epsilon_n^2 + M \eta_n^R(\gamma) \geq 0 \forall n \geq 1$  and  $\gamma > 0$ . □

### C.3 Proof of Theorem 3.2

**Lemma C.6.** *Given  $a' \in \mathcal{A}$  and for a constant  $M$ , as defined in Theorem 3.1*

$$\mathbb{E}_{P_0^n} \left[ \sup_{a \in \mathcal{A}} \left| \mathbb{E}_{Q_{a', \gamma}^*(\theta | \tilde{X}_n)} [R(a, \theta)] - R(a, \theta_0) \right| \right] \leq [M(\gamma) \epsilon_n^2 + M \eta_n^R(\gamma)]^{\frac{1}{2}}. \quad (40)$$

*Proof.* First, observe that

$$\begin{aligned} \left( \sup_{a \in \mathcal{A}} \left| \mathbb{E}_{Q_{a', \gamma}^*(\theta | \tilde{X}_n)} [R(a, \theta)] - R(a, \theta_0) \right| \right)^2 & \leq \left( \mathbb{E}_{Q_{a', \gamma}^*(\theta | \tilde{X}_n)} \left[ \sup_{a \in \mathcal{A}} |R(a, \theta) - R(a, \theta_0)| \right] \right)^2 \\ & \leq \mathbb{E}_{Q_{a', \gamma}^*(\theta | \tilde{X}_n)} \left[ \left( \sup_{a \in \mathcal{A}} |R(a, \theta) - R(a, \theta_0)| \right)^2 \right], \end{aligned}$$

where the last inequality follows from Jensen's inequality. Now, using the Jensen's inequality again

$$\begin{aligned} & \left( \mathbb{E}_{P_0^n} \left[ \sup_{a \in \mathcal{A}} \left| \mathbb{E}_{Q_{a', \gamma}^*(\theta | \tilde{X}_n)} [R(a, \theta)] - R(a, \theta_0) \right| \right] \right)^2 \\ & \leq \mathbb{E}_{P_0^n} \left[ \left( \sup_{a \in \mathcal{A}} \left| \mathbb{E}_{Q_{a', \gamma}^*(\theta | \tilde{X}_n)} [R(a, \theta)] - R(a, \theta_0) \right| \right)^2 \right]. \end{aligned}$$

Now, using Theorem 3.1 the result follows immediately. □

*Proof of Theorem 3.2.* Observe that

$$\begin{aligned}
& R(\mathbf{a}_{\text{RS}}^*, \theta_0) - \inf_{z \in \mathcal{A}} R(z, \theta_0) \\
&= |R(\mathbf{a}_{\text{RS}}^*, \theta_0) - \inf_{z \in \mathcal{A}} R(z, \theta_0)| \\
&= R(\mathbf{a}_{\text{RS}}^*, \theta_0) - \mathbb{E}_{Q_{\mathbf{a}_{\text{RS}}^*, \gamma}^*(\theta|\tilde{X}_n)}[R(\mathbf{a}_{\text{RS}}^*, \theta)] + \mathbb{E}_{Q_{\mathbf{a}_{\text{RS}}^*, \gamma}^*(\theta|\tilde{X}_n)}[R(\mathbf{a}_{\text{RS}}^*, \theta)] - \inf_{z \in \mathcal{A}} R(z, \theta_0) \\
&\leq \left| R(\mathbf{a}_{\text{RS}}^*, \theta_0) - \mathbb{E}_{Q_{\mathbf{a}_{\text{RS}}^*, \gamma}^*(\theta|\tilde{X}_n)}[R(\mathbf{a}_{\text{RS}}^*, \theta)] \right| + \left| \mathbb{E}_{Q_{\mathbf{a}_{\text{RS}}^*, \gamma}^*(\theta|\tilde{X}_n)}[R(\mathbf{a}_{\text{RS}}^*, \theta)] - \inf_{a \in \mathcal{A}} R(a, \theta_0) \right| \\
&\leq 2 \sup_{a \in \mathcal{A}} \left| \int R(a, \theta) dQ_{\mathbf{a}_{\text{RS}}^*, \gamma}^*(\theta|\tilde{X}_n) - R(a, \theta_0) \right|. \tag{41}
\end{aligned}$$

Given  $\mathbf{a}_{\text{RS}}^* \in \mathcal{A}$  and for a constant  $M$  (defined in Theorem 3.1), we have from Lemma C.6 for  $a' = \mathbf{a}_{\text{RS}}^*$

$$\mathbb{E}_{P_0^n} \left[ \sup_{a \in \mathcal{A}} \left| \int R(a, \theta) dQ_{\mathbf{a}_{\text{RS}}^*, \gamma}^*(\theta|\tilde{X}_n) - R(a, \theta_0) \right| \right] \leq [M(\gamma)\epsilon_n^2 + M\eta_n^R(\gamma)]^{\frac{1}{2}}. \tag{42}$$

It follows from above that the  $P_0^n$  – probability of the following event is at least  $1 - \tau^{-1}$ :

$$\left\{ \tilde{X}_n : R(\mathbf{a}_{\text{RS}}^*, \theta_0) - \inf_{z \in \mathcal{A}} R(z, \theta_0) \leq 2\tau [M(\gamma)\epsilon_n^2 + M\eta_n^R(\gamma)]^{\frac{1}{2}} \right\}. \tag{43}$$

□

#### C.4 Proofs in Section 3.1

*Proof of Proposition 3.1.* Using the definition of  $\eta_n^R(\gamma)$  and the posterior distribution  $\Pi(\theta|\tilde{X}_n)$ , observe that

$$\begin{aligned}
n\eta_n^R(\gamma) &= \inf_{Q \in \mathcal{Q}} \mathbb{E}_{P_0^n} \left[ \text{KL}(Q\|\Pi_n) - \gamma \inf_{a \in \mathcal{A}} \mathbb{E}_Q[R(a, \theta)] \right] \\
&= \inf_{Q \in \mathcal{Q}} \mathbb{E}_{P_0^n} \left[ \text{KL}(Q\|\Pi) + \int_{\Theta} dQ(\theta) \log \left( \frac{\int d\Pi(\theta)p(\tilde{X}_n|\theta)}{p(\tilde{X}_n|\theta)} \right) - \gamma \inf_{a \in \mathcal{A}} \mathbb{E}_Q[R(a, \theta)] \right] \\
&= \inf_{Q \in \mathcal{Q}} \left[ \text{KL}(Q\|\Pi) - \gamma \inf_{a \in \mathcal{A}} \mathbb{E}_Q[R(a, \theta)] + \mathbb{E}_{P_0^n} \left[ \mathbb{E}_Q \left[ \log \left( \frac{\int d\Pi(\theta)p(\tilde{X}_n|\theta)}{p(\tilde{X}_n|\theta)} \right) \right] \right] \right].
\end{aligned}$$

Now, using Fubini's in the last term of the equation above, we obtain

$$\begin{aligned}
n\eta_n^R(\gamma) &= \inf_{Q \in \mathcal{Q}} \left[ \text{KL}(Q(\theta)\|\Pi(\theta)) - \gamma \inf_{a \in \mathcal{A}} \mathbb{E}_Q[R(a, \theta)] \right. \\
&\quad \left. + \mathbb{E}_Q \left[ \text{KL} \left( dP_0^n \| p(\tilde{X}_n|\theta) \right) - \text{KL} \left( dP_0^n \left\| \int d\Pi(\theta)p(\tilde{X}_n|\theta) \right\| \right) \right] \right]. \tag{44}
\end{aligned}$$

Observe that,  $\int_{\mathcal{X}^n} \int d\Pi(\theta)p(\tilde{X}_n|\theta)d\tilde{X}_n = 1$ . Since, KL is always non-negative, it follows from the equation above that

$$\begin{aligned}
& \eta_n^R(\gamma) \\
&\leq \frac{1}{n} \inf_{Q \in \mathcal{Q}} \left[ \text{KL}(Q(\theta)\|\Pi(\theta)) - \gamma \inf_{a \in \mathcal{A}} \mathbb{E}_Q[R(a, \theta)] + \mathbb{E}_Q \left[ \text{KL} \left( dP_0^n \| p(\tilde{X}_n|\theta) \right) \right] \right] \\
&\leq \frac{1}{n} \inf_{Q \in \mathcal{Q}} \left[ \text{KL}(Q(\theta)\|\Pi(\theta)) + \mathbb{E}_Q \left[ \text{KL} \left( dP_0^n \| p(\tilde{X}_n|\theta) \right) \right] \right] - \frac{\gamma}{n} \inf_{Q \in \mathcal{Q}} \inf_{a \in \mathcal{A}} \mathbb{E}_Q[R(a, \theta)], \tag{45}
\end{aligned}$$

where the last inequality follows from the following fact, for any functions  $f(\cdot)$  and  $g(\cdot)$ ,

$$\inf(f - g) \leq \inf f - \inf g.$$

Recall  $\epsilon'_n \geq \frac{1}{\sqrt{n}}$ . Now, using Assumption 3.1, it is straightforward to observe that the first term in (45),

$$\frac{1}{n} \inf_{Q \in \mathcal{Q}} \left[ \text{KL}(Q(\theta) \| \Pi(\theta)) + \mathbb{E}_Q \left[ \text{KL} \left( dP_0^n \| p(\tilde{X}_n | \theta) \right) \right] \right] \leq C_9 \epsilon_n'^2. \quad (46)$$

Now consider the last term in (45). Notice that the coefficient of  $\frac{1}{n}$  is independent of  $n$  and is bounded from below. Therefore, there exist a constant  $C_8 = -\inf_{Q \in \mathcal{Q}} \inf_{a \in \mathcal{A}} \mathbb{E}_Q[R(a, \theta)]$ , such that with equation (46) it follows that  $\eta_n^R(\gamma) \leq \gamma n^{-1} C_8 + C_9 \epsilon_n'^2$  and the result follows.  $\square$

*Proof of Proposition 3.2.* First recall that

$$\begin{aligned} n\eta_n^R(\gamma) &= \inf_{Q \in \mathcal{Q}} \mathbb{E}_{P_0^n} \left[ \text{KL}(Q(\theta) \| \Pi(\theta | \tilde{X}_n)) - \gamma \inf_{a \in \mathcal{A}} \mathbb{E}_Q[R(a, \theta)] \right] \\ &= \inf_{Q \in \mathcal{Q}} \mathbb{E}_{P_0^n} \left[ \text{KL}(Q(\theta) \| \Pi(\theta | \tilde{X}_n)) \right] - \gamma \inf_{a \in \mathcal{A}} \mathbb{E}_Q[R(a, \theta)]. \end{aligned} \quad (47)$$

Observe that the optimization problem is equivalent to solving :

$$\min_{Q \in \mathcal{Q}} \mathbb{E}_{P_0^n} \left[ \text{KL}(Q(\theta) \| \Pi(\theta | \tilde{X}_n)) \right] \text{ s.t. } -\inf_{a \in \mathcal{A}} \mathbb{E}_Q[R(a, \theta)] \leq 0. \quad (48)$$

Now for any  $\gamma > 0$ ,  $Q_\gamma^*(\theta) \in \mathcal{Q}$  that minimizes the objective in (47) is primal feasible if

$$-\inf_{a \in \mathcal{A}} \int_{\Theta} dQ_\gamma^*(\theta) R(a, \theta) \leq 0.$$

Therefore, it is straightforward to observe that as  $\gamma$  increases  $n\eta_n^R(\gamma)$  decreases that is

$$\mathbb{E}_{P_0^n} \left[ \int_{\Theta} dQ_\gamma^*(\theta) \log \frac{dQ_\gamma^*(\theta)}{d\Pi(\theta | \tilde{X}_n)} - \gamma \inf_{a \in \mathcal{A}} \int_{\Theta} dQ_\gamma^*(\theta) R(a, \theta) \right].$$

$\square$

### C.5 Sufficient conditions on $R(a, \theta)$ for existence of tests

To show the existence of test functions, as required in Assumption 2.1, we will use the following result from [11, Theorem 7.1], that is applicable only to distance measures that are bounded above by the Hellinger distance.

**Lemma C.7** (Theorem 7.1 of [11]). *Suppose that for some non-increasing function  $D(\epsilon)$ , some  $\epsilon_n > 0$  and for every  $\epsilon > \epsilon_n$ ,*

$$N\left(\frac{\epsilon}{2}, \{P_\theta : \epsilon \leq m(\theta, \theta_0) \leq 2\epsilon\}, m\right) \leq D(\epsilon),$$

*where  $m(\cdot, \cdot)$  is any distance measure bounded above by Hellinger distance. Then for every  $\epsilon > \epsilon_n$ , there exists a test  $\phi_n$  (depending on  $\epsilon > 0$ ) such that, for every  $j \geq 1$ ,*

$$\begin{aligned} \mathbb{E}_{P_0^n}[\phi_n] &\leq D(\epsilon) \exp\left(-\frac{1}{2}n\epsilon^2\right) \frac{1}{1 - \exp\left(-\frac{1}{2}n\epsilon^2\right)}, \text{ and} \\ \sup_{\{\theta \in \Theta_n(\epsilon) : m(\theta, \theta_0) > j\epsilon\}} \mathbb{E}_{P_\theta^n}[1 - \phi_n] &\leq \exp\left(-\frac{1}{2}n\epsilon^2 j\right). \end{aligned}$$

*Proof of Lemma C.7:* Refer Theorem 7.1 of [11].  $\square$

For the remaining part of this subsection we assume that  $\Theta \subseteq \mathbb{R}^d$ . In the subsequent paragraph, we state further assumptions on the risk function to show  $L_n(\cdot, \cdot)$  as defined in (6) satisfies Assumption 2.1. For brevity we denote  $n^{-1/2} \sqrt{L_n(\theta, \theta_0)}$  by  $d_L(\theta, \theta_0)$ , that is

$$d_L(\theta_1, \theta_2) := \sup_{a \in \mathcal{A}} |R(a, \theta_1) - R(a, \theta_2)|, \quad \forall \{\theta_1, \theta_2\} \in \Theta \quad (49)$$

and the covering number of the set  $T(\epsilon) := \{P_\theta : d_L(\theta, \theta_0) < \epsilon\}$  as  $N(\delta, T(\epsilon), d_L)$ , where  $\delta > 0$  is the radius of each ball in the cover. We assume that the risk function  $R(a, \cdot)$  satisfies the following bound.

**Assumption C.1.** *The model risk satisfies*

$$d_L(\theta_1, \theta_2) \leq K_1 d_H(\theta, \theta_0),$$

where  $d_H(\theta_1, \theta_2)$  is the Hellinger distance between two models  $P_{\theta_1}$  and  $P_{\theta_2}$ .

For instance, suppose the definition of model risk is  $R(a, \theta) = \int_{\mathcal{X}} \ell(x, a) p(y|\theta) dx$ , where  $\ell(x, a)$  is an underlying loss function. Then, observe that Assumption C.1 is trivially satisfied if  $\ell(x, a)$  is bounded in  $x$  for a given  $a \in \mathcal{A}$  and  $\mathcal{A}$  is compact, since  $d_L(\theta_1, \theta_2)$  can be bounded by the total variation distance  $d_{TV}(\theta_1, \theta_2) = \frac{1}{2} \int |dP_{\theta_1}(x) - dP_{\theta_2}(x)|$  and total variation distance is bounded above by the Hellinger distance [12]. Under the assumption above it also follows that we can apply Lemma C.7 to the metric  $d_L(\cdot, \cdot)$  defined in (49). Now, we will also assume an additional regularity condition on the risk function.

**Assumption C.2.** *For every  $\{\theta_1, \theta_2\} \in \Theta$ , there exists a constant  $K_2 > 0$  such that*

$$d_L(\theta_1, \theta_2) \leq K_2 \|\theta_1 - \theta_2\|,$$

We can now show that the covering number of the set  $T(\epsilon)$  satisfies

**Lemma C.8.** *Given  $\epsilon > \delta > 0$ , and under Assumption C.2,*

$$N(\delta, T(\epsilon), d_L) < \left( \frac{2\epsilon}{\delta} + 2 \right)^d. \quad (50)$$

*Proof of Lemma C.8:* For any positive  $k$  and  $\epsilon$ , let  $\theta \in [\theta_0 - k\epsilon, \theta_0 + k\epsilon]^d \subset \Theta \subset \mathbb{R}^d$ . Now consider a set  $H_i = \{\theta_i^0, \theta_i^1, \dots, \theta_i^J, \theta_i^{J+1}\}$  and  $H = \bigotimes_d H_i$  with  $J = \lfloor \frac{2k\epsilon}{\delta'} \rfloor$ , where  $\theta_i^j = \theta_0 - k\epsilon + i\delta'$  for  $j = \{0, 1, \dots, J\}$  and  $\theta_i^{J+1} = \theta_0 + k\epsilon$ . Observe that for any  $\theta \in [\theta_0 - k\epsilon, \theta_0 + k\epsilon]^d$ , there exists a  $\theta^j \in H$  such that  $\|\theta - \theta^j\| < \delta'$ . Hence, union of the  $\delta'$ -balls for each element in set  $H$  covers  $[\theta_0 - k\epsilon, \theta_0 + k\epsilon]^d$ , therefore  $N(\delta', [\theta_0 - k\epsilon, \theta_0 + k\epsilon]^d, \|\cdot\|) = (J+2)^d$ .

Now, due to Assumption C.2, for any  $\theta \in [\theta_0 - k\epsilon, \theta_0 + k\epsilon]^d$

$$d_L(\theta, \theta_0) \leq K_2 \|\theta - \theta^j\| \leq K_2 \delta',$$

For brevity, we denote  $n^{-1} L_n(\theta, \theta_0)$  by  $d_L(\theta, \theta_0)$ , that is

$$d_L(\theta_1, \theta_2) := \sup_{a \in \mathcal{A}} |R(a, \theta_1) - R(a, \theta_2)|, \quad \forall \{\theta_1, \theta_2\} \in \Theta, \quad (51)$$

and the covering number of the set  $T(\epsilon) := \{P_\theta : d_L(\theta, \theta_0) < \epsilon\}$  as  $N(\delta, T(\epsilon), d_L)$ , where  $\delta > 0$  is the radius of each ball in the cover.

Hence,  $\delta'$ -cover of set  $[\theta_0 - k\epsilon, \theta_0 + k\epsilon]^d$  is  $K_1 \delta'$  cover of set  $T(\epsilon)$  with  $k = 1/K_2$ . Finally,

$$N(K_2 \delta', T(\epsilon), d_L) \leq (J+2)^d \leq \left( \frac{2k\epsilon}{\delta'} + 2 \right)^d = \left( \frac{2\epsilon}{K_2 \delta'} + 2 \right)^d$$

which implies for  $\delta = K_2 \delta'$ ,

$$N(\delta, T(\epsilon), d_L) \leq \left( \frac{2\epsilon}{\delta} + 2 \right)^s.$$

□

Observe that the RHS in (50) is a decreasing function of  $\delta$ , infact for  $\delta = \epsilon/2$ , it is a constant in  $\epsilon$ . Therefore, using Lemmas C.7 and C.8, we show in the following result that  $L_n(\theta, \theta_0)$  in (6) satisfies Assumption 2.1.

**Lemma C.9.** Fix  $n \geq 1$ . For a given  $\epsilon_n > 0$  and every  $\epsilon > \epsilon_n$ , such that  $n\epsilon_n^2 \geq 1$ . Under Assumption C.1 and C.2,  $L_n(\theta, \theta_0) = n (\sup_{a \in \mathcal{A}} |R(a, \theta) - R(a, \theta_0)|)^2$  satisfies

$$\mathbb{E}_{P_0^n}[\phi_n] \leq C_0 \exp(-Cn\epsilon^2), \quad (52)$$

$$\sup_{\{\theta \in \Theta: L_n(\theta, \theta_0) \geq C_1 n \epsilon^2\}} \mathbb{E}_{P_\theta^n}[1 - \phi_n] \leq \exp(-Cn\epsilon^2), \quad (53)$$

where  $C_0 = 2 * 10^8$  and  $C = \frac{C_1}{2K_1^2}$  for a constant  $C_1 > 0$ .

*Proof of Lemma C.9:* Recall  $d_L(\theta, \theta_0) = (\sup_{a \in \mathcal{A}} |R(a, \theta) - R(a, \theta_0)|)$  and  $T(\epsilon) = \{P_\theta : d_L(\theta, \theta_0) < \epsilon\}$ . Using Lemma C.8, observe that for every  $\epsilon > \epsilon_n > 0$ ,

$$N\left(\frac{\epsilon}{2}, \{\theta : \epsilon \leq d_L(\theta, \theta_0) \leq 2\epsilon\}, d_L\right) \leq N\left(\frac{\epsilon}{2}, \{\theta : d_L(\theta, \theta_0) \leq 2\epsilon\}, d_L\right) < 10^d.$$

Next, using Assumption C.1 we have

$$d_L(\theta, \theta_0) \leq K_1 d_H(\theta, \theta_0).$$

It follows from the above two observations and Lemma 2 that, for every  $\epsilon > \epsilon_n > 0$ , there exist tests  $\{\phi_{n,\epsilon}\}$  such that

$$\mathbb{E}_{P_0^n}[\phi_{n,\epsilon}] \leq 10^d \frac{\exp(-C'n\epsilon^2)}{1 - \exp(-C'n\epsilon^2)}, \quad (54)$$

$$\sup_{\{\theta \in \Theta: d_L(\theta, \theta_0) \geq \epsilon\}} \mathbb{E}_{P_\theta^n}[1 - \phi_{n,\epsilon}] \leq \exp(-C'n\epsilon^2), \quad (55)$$

where  $C' = \frac{1}{2K_1^2}$ . Since the above two conditions hold for every  $\epsilon > \epsilon_n$ , we can choose a constant  $K > 0$  such that for every  $\epsilon > \epsilon_n$

$$\mathbb{E}_{P_0^n}[\phi_{n,\epsilon}] \leq 10^d \frac{\exp(-C'K^2n\epsilon^2)}{1 - \exp(-C'K^2n\epsilon^2)} \leq 2(10^d)e^{-C'K^2n\epsilon^2}, \quad (56)$$

$$\sup_{\{\theta \in \Theta: L_n(\theta, \theta_0) \geq K^2n\epsilon^2\}} \mathbb{E}_{P_\theta^n}[1 - \phi_{n,\epsilon}] = \sup_{\{\theta \in \Theta: d_L(\theta, \theta_0) \geq K\epsilon\}} \mathbb{E}_{P_\theta^n}[1 - \phi_{n,\epsilon}] \leq e^{-C'K^2n\epsilon^2}, \quad (57)$$

where the second inequality in (56) holds  $\forall n \geq n_0$ , where  $n_0 := \min\{n \geq 1 : C'K^2n\epsilon^2 \geq \log(2)\}$ . Hence, the result follows for  $C_1 = K^2$  and  $C = C'K^2$ .  $\square$

Since  $L_n(\theta, \theta_0) = \frac{1}{n}d_L^2$  satisfies Assumption 2.1, Theorem 3.1 implies the following bound.

**Corollary C.1.** Fix  $a' \in \mathcal{A}$  and  $\gamma > 0$ . Let  $\epsilon_n$  be a sequence such that  $\epsilon_n \rightarrow 0$  as  $n \rightarrow \infty$ ,  $n\epsilon_n^2 \geq 1$  and

$$L_n(\theta, \theta_0) = n \left( \sup_{a \in \mathcal{A}} |R(a, \theta) - R(a, \theta_0)| \right)^2.$$

Then under the Assumptions of Theorem 3.1 and Lemma C.9; for  $C = \frac{C_1}{2K_1^2}$ ,  $C_0 = 2 * 10^8$ ,  $C_1 > 0$  such that  $\min(C, C_4(\gamma) + C_5(\gamma)) > C_2 + C_3 + C_4(\gamma) + 2$ , and for  $\eta_n^R(\gamma)$  as defined in Theorem 3.1, the RSVB approximator of the true posterior  $Q_{a',\gamma}^*(\theta|\tilde{X}_n)$  satisfies,

$$\mathbb{E}_{P_0^n} \left[ \int_{\Theta} L_n(\theta, \theta_0) Q_{a',\gamma}^*(\theta|\tilde{X}_n) d\theta \right] \leq n(M(\gamma)\epsilon_n^2 + M\eta_n^R(\gamma)), \quad (58)$$

for sufficiently large  $n$  and for a function  $M(\gamma) = 2(C_1 + MC_4(\gamma))$ , where  $M = \frac{2C_1}{\min(C, \lambda, 1)}$ .

*Proof of Corollary C.1:* Using Lemma C.9 observe that for any  $\Theta_n(\epsilon) \subseteq \Theta$ ,  $L_n(\theta, \theta_0)$  satisfies Assumption 2.1 with  $C_0 = 2 * 10^8$ ,  $C = \frac{C_1}{2K_1^2}$  and for any  $C_1 > 0$ , since

$$\sup_{\{\theta \in \Theta_n(\epsilon): L_n(\theta, \theta_0) \geq C_1 n \epsilon_n^2\}} \mathbb{E}_{P_\theta^n}[1 - \phi_{n,\epsilon}] \leq \sup_{\{\theta \in \Theta: L_n(\theta, \theta_0) \geq C_1 n \epsilon_n^2\}} \mathbb{E}_{P_\theta^n}[1 - \phi_{n,\epsilon}] \leq e^{-Cn\epsilon_n^2}.$$

Hence, applying Theorem 3.1 the proof follows.  $\square$

## C.6 Newsvendor Problem

We fix  $n^{-1/2} \sqrt{L_n^{NV}(\theta, \theta_0)} = (\sup_{a \in \mathcal{A}} |R(a, \theta) - R(a, \theta_0)|)$ . Next, we aim to show that the exponentially distributed model  $P_\theta$  satisfies Assumption 2.1, for distance function  $L_n^{NV}(\theta, \theta_0)$ . To show this, in the next result we first prove that  $d_L^{NV}(\theta, \theta_0) = n^{-1/2} \sqrt{L_n^{NV}(\theta, \theta_0)}$  satisfy Assumption C.1. Also, recall that the square of Hellinger distance between two exponential distributions with rate parameter  $\theta$  and  $\theta_0$  is  $d_H^2(\theta, \theta_0) = 1 - 2 \frac{\sqrt{\theta\theta_0}}{\theta + \theta_0} = 1 - 2 \frac{\sqrt{\theta_0/\theta}}{1 + \theta_0/\theta}$ .

**Lemma C.10.** *For any  $\theta \in \Theta = [T, \infty)$ , and  $a \in \mathcal{A}$ ,*

$$d_L^{NV}(\theta, \theta_0) \leq \left[ \frac{\left( \frac{h}{\theta_0} - \frac{h}{T} \right)^2 + (b+h)^2 \left( \frac{e^{-aT}}{T} - \frac{e^{-a\theta_0}}{\theta_0} \right)^2}{d_H^2(T, \theta_0)} \right]^{1/2} d_H(\theta, \theta_0)$$

where  $\underline{a} := \min\{a \in \mathcal{A}\}$  and  $\underline{a} > 0$  and  $\theta_0$  lies in the interior of  $\Theta$ .

*Proof.* Observe that for any  $a \in \mathcal{A}$ ,

$$\begin{aligned} & |R(a, \theta) - R(a, \theta_0)|^2 \\ &= \left| \frac{h}{\theta_0} - \frac{h}{\theta} + (b+h) \left( \frac{e^{-a\theta}}{\theta} - \frac{e^{-a\theta_0}}{\theta_0} \right) \right|^2 \\ &= \left( \frac{h}{\theta_0} - \frac{h}{\theta} \right)^2 + (b+h)^2 \left( \frac{e^{-a\theta}}{\theta} - \frac{e^{-a\theta_0}}{\theta_0} \right)^2 + 2 \left( \frac{h}{\theta_0} - \frac{h}{\theta} \right) (b+h) \left( \frac{e^{-a\theta}}{\theta} - \frac{e^{-a\theta_0}}{\theta_0} \right) \\ &\leq \left( \frac{h}{\theta_0} - \frac{h}{\theta} \right)^2 + (b+h)^2 \left( \frac{e^{-a\theta}}{\theta} - \frac{e^{-a\theta_0}}{\theta_0} \right)^2, \end{aligned} \tag{59}$$

where the last inequality follows since for  $\theta \geq \theta_0$ ,  $\left( \frac{h}{\theta_0} - \frac{h}{\theta} \right) \geq 0$  and  $\left( \frac{e^{-a\theta}}{\theta} - \frac{e^{-a\theta_0}}{\theta_0} \right) < 0$  and vice versa if  $\theta < \theta_0$  that together makes the last term in the penultimate equality negative for all  $\theta \in \Theta$ . Moreover, the first derivative of the upperbound with respect to  $\theta$  is

$$2 \left( \frac{h}{\theta_0} - \frac{h}{\theta} \right) \frac{h}{\theta^2} - 2(b+h)^2 \left( \frac{e^{-a\theta}}{\theta} - \frac{e^{-a\theta_0}}{\theta_0} \right) e^{-a\theta} \left[ \frac{1}{\theta^2} + \frac{a}{\theta} \right],$$

and it is negative when  $\theta \leq \theta_0$  and positive when  $\theta > \theta_0$  for all  $b > 0, h > 0$ , and  $a \in \mathcal{A}$ . Therefore, the upperbound in (59) above is decreasing function of  $\theta$  for all  $\theta \leq \theta_0$  and increasing function of  $\theta$  for all  $\theta > \theta_0$ . The upperbound is tight at  $\theta = \theta_0$ .

Now recall that the squared Hellinger distance between two exponential distributions with rate parameter  $\theta$  and  $\theta_0$  is

$$d_H^2(\theta, \theta_0) = 1 - 2 \frac{\sqrt{\theta\theta_0}}{\theta + \theta_0} = 1 - 2 \frac{\sqrt{\theta_0/\theta}}{1 + \theta_0/\theta} = \frac{(1 - \sqrt{\theta_0/\theta})^2}{1 + (\sqrt{\theta_0/\theta})^2}.$$

Note that for  $\theta \leq \theta_0$ ,  $d_H^2(\theta, \theta_0)$  is a decreasing function of  $\theta$  and for all  $\theta > \theta_0$  it is an increasing function of  $\theta$ . Also, note that as  $\theta \rightarrow \infty$ , the squared Hellinger distance as well as the upperbound computed in (59) converges to a constant for a given  $h, b, \theta_0$  and  $a$ . However, as  $\theta \rightarrow 0$ , the  $d_H^2(\theta, \theta_0) \rightarrow 1$  but the upperbound computed in (59) diverges.

Since,  $\Theta = [T, \infty)$  for some  $T > 0$  and  $T \leq \theta_0$ , observe that if we scale  $d_H^2(\theta, \theta_0)$  by factor by which the upperbound computed in (59) is greater than  $d_H$  at  $\theta = T$ , then

$$\begin{aligned} & \left( \frac{h}{\theta_0} - \frac{h}{\theta} \right)^2 + (b+h)^2 \left( \frac{e^{-a\theta}}{\theta} - \frac{e^{-a\theta_0}}{\theta_0} \right)^2 \\ & \leq \frac{\left( \frac{h}{\theta_0} - \frac{h}{T} \right)^2 + (b+h)^2 \left( \frac{e^{-aT}}{T} - \frac{e^{-a\theta_0}}{\theta_0} \right)^2}{d_H^2(T, \theta_0)} d_H^2(\theta, \theta_0) \\ & \leq \frac{\left( \frac{h}{\theta_0} - \frac{h}{T} \right)^2 + (b+h)^2 \left( \frac{e^{-aT}}{T} - \frac{e^{-a\theta_0}}{\theta_0} \right)^2}{d_H^2(T, \theta_0)} d_H^2(\theta, \theta_0), \end{aligned}$$

where  $\underline{a} = \inf\{a : a \in \mathcal{A}\}$  and in the last inequality we used the fact that  $\left(\frac{e^{-aT}}{T} - \frac{e^{-a\theta_0}}{\theta_0}\right)^2$  is a decreasing function of  $a$  for any  $b, h, T$ , and  $\theta_0$ . Since, the RHS in the equation above does not depend on  $a$ , it follows from the result in (59) and the definition of  $L_n^{NV}(\theta, \theta_0)$  that

$$d_L^{NV}(\theta, \theta_0) \leq \left[ \frac{\left(\frac{h}{\theta_0} - \frac{h}{T}\right)^2 + (b+h)^2 \left(\frac{e^{-aT}}{T} - \frac{e^{-a\theta_0}}{\theta_0}\right)^2}{d_H^2(T, \theta_0)} \right]^{1/2} d_H(\theta, \theta_0).$$

□

**Lemma C.11.** *For any  $\theta \in \Theta = [T, \infty)$ , for sufficiently small  $T > 0$ , and  $\theta_0$  lying in the interior of  $\Theta$ , we have*

$$d_H^2(\theta, \theta_0) = 1 - 2 \frac{\sqrt{\theta\theta_0}}{\theta + \theta_0} \leq \left( \frac{\theta_0}{(T + \theta_0)^2} \left( \sqrt{\frac{\theta_0}{T}} - \sqrt{\frac{T}{\theta_0}} \right) \right) |\theta - \theta_0|.$$

*Proof.* Observe that

$$\frac{\partial d_H^2(\theta, \theta_0)}{\partial \theta} = -2 \frac{(\theta + \theta_0) \frac{\sqrt{\theta_0}}{2\sqrt{\theta}} - \sqrt{\theta\theta_0}}{(\theta + \theta_0)^2} = \frac{\theta_0}{(\theta + \theta_0)^2} \left( \sqrt{\frac{\theta}{\theta_0}} - \sqrt{\frac{\theta_0}{\theta}} \right).$$

Observe that  $\theta \rightarrow 0$ ,  $\frac{\partial d_H^2(\theta, \theta_0)}{\partial \theta} \rightarrow \infty$ . Since,  $\theta \in \Theta = [T, \infty)$ , therefore the  $\sup_{\theta \in \Theta} \left| \frac{\partial d_H^2(\theta, \theta_0)}{\partial \theta} \right| < \infty$ . In fact, for sufficiently small  $T > 0$ ,  $\sup_{\theta \in \Theta} \left| \frac{\partial d_H^2(\theta, \theta_0)}{\partial \theta} \right| = \left| \frac{\theta_0}{(T + \theta_0)^2} \left( \sqrt{\frac{T}{\theta_0}} - \sqrt{\frac{\theta_0}{T}} \right) \right| = \left( \frac{\theta_0}{(T + \theta_0)^2} \left( \sqrt{\frac{\theta_0}{T}} - \sqrt{\frac{T}{\theta_0}} \right) \right)$ . Now the result follows immediately since the derivative of  $d_H^2(\theta, \theta_0)$  is bounded on  $\Theta$ , which implies that  $d_H^2(\theta, \theta_0)$  is Lipschitz on  $\Theta$ . □

**Lemma C.12.** *For any  $\theta \in \Theta = [T, \infty)$ , and  $a \in \mathcal{A}$ ,*

$$d_L^{NV}(\theta, \theta_0) \leq \frac{h}{T^2} |\theta - \theta_0|.$$

*Proof.* Recall,

$$R(a, \theta) = ha - \frac{h}{\theta} + (b+h) \frac{e^{-a\theta}}{\theta}.$$

First, observe that for any  $a \in \mathcal{A}$ ,

$$\frac{\partial R(a, \theta)}{\partial \theta} = \frac{h}{\theta^2} - a(b+h) \frac{e^{-a\theta}}{\theta} - (b+h) \frac{e^{-a\theta}}{\theta^2} = \frac{1}{\theta^2} (h - (b+h)e^{-a\theta}(1 + a\theta)) \leq \frac{h}{\theta^2}. \quad (60)$$

The result follows immediately, since  $\sup_{\theta \in \Theta} \frac{\partial R(a, \theta)}{\partial \theta} \leq \frac{h}{T^2}$ . □

*Proof.* Proof of Lemma B.1

It follows from Lemma C.10 that  $d_L^{NV}(\theta, \theta_0)$  for any  $\theta \in \Theta = [T, \infty)$  and  $\theta_0$  lying the interior of  $\Theta$ , satisfies Assumption C.1 with

$$K_1 = \left[ \frac{\left(\frac{h}{\theta_0} - \frac{h}{T}\right)^2 + (b+h)^2 \left(\frac{e^{-aT}}{T} - \frac{e^{-a\theta_0}}{\theta_0}\right)^2}{d_H^2(T, \theta_0)} \right]^{1/2} := K_1^{NV}$$

. Similarly, it follows from Lemma and C.12 that for sufficiently small  $T > 0$ ,  $d_L^{NV}(\theta, \theta_0)$  satisfies Assumption C.2 with  $K_2 = h/T^2 := K_2^{NV}$ . Now using similar arguments as used in Lemma C.8 and Lemma 2.1, for a given  $\epsilon_n > 0$  and every  $\epsilon > \epsilon_n$ , such that  $n\epsilon_n^2 \geq 1$ , it can be shown that,  $L_n^{NV}(\theta, \theta_0) = n(\sup_{a \in \mathcal{A}} |R(a, \theta) - R(a, \theta_0)|)^2$  satisfies

$$\mathbb{E}_{P_0^n}[\phi_n] \leq C_0 \exp(-Cn\epsilon^2), \quad (61)$$

$$\sup_{\{\theta \in \Theta: L_n^{NV}(\theta, \theta_0) \geq C_1 n \epsilon^2\}} \mathbb{E}_{P_\theta^n}[1 - \phi_n] \leq \exp(-Cn\epsilon^2), \quad (62)$$

where  $C_0 = 20$  and  $C = \frac{C_1}{2(K_1^{NV})^2}$  for a constant  $C_1 > 0$ .  $\square$

*Proof.* Proof of Lemma B.2:

First, we write the Rényi divergence between  $P_0^n$  and  $P_\theta^n$ ,

$$\begin{aligned} D_{1+\lambda}(P_0^n \| P_\theta^n) &= \frac{1}{\lambda} \log \int \left( \frac{dP_0^n}{dP_\theta^n} \right)^\lambda dP_0^n = n \frac{1}{\lambda} \log \int \left( \frac{dP_0}{dP_\theta} \right)^\lambda dP_0 \\ &= n \left( \log \frac{\theta_0}{\theta} + \frac{1}{\lambda} \log \frac{\theta_0}{(\lambda+1)\theta_0 - \lambda\theta} \right), \end{aligned}$$

when  $((\lambda+1)\theta_0 - \lambda\theta) > 0$  and  $D_{1+\lambda}(P_0^n \| P_\theta^n) = \infty$  otherwise. Also, observe that,  $D_{1+\lambda}(P_0^n \| P_\theta^n)$  is non-decreasing in  $\lambda$  (this also follows from non-decreasing property of the Rényi divergence with respect to  $\lambda$ ). Therefore, observe that

$$\begin{aligned} \Pi(D_{1+\lambda}(P_0^n \| P_\theta^n) \leq C_3 n \epsilon_n^2) &\geq \Pi(D_\infty(P_0^n \| P_\theta^n) \leq C_3 n \epsilon_n^2) = \Pi\left(0 \leq \log \frac{\theta_0}{\theta} \leq C_3 \epsilon_n^2\right) \\ &= \Pi\left(\theta_0 e^{-C_3 \epsilon_n^2} \leq \theta \leq \theta_0\right). \end{aligned}$$

Now, recall that for a set  $A \subseteq \Theta = [T, \infty)$ , we define  $\Pi(A) = \text{Inv} - \Gamma(A \cap \Theta) / \text{Inv} - \Gamma(\Theta)$ . Now, observe that for sufficiently small  $T$  and large enough  $n$ , we have

$$\Pi\left(\theta_0 e^{-C_3 \epsilon_n^2} \leq \theta \leq \theta_0\right) \geq \text{Inv} - \Gamma\left(\theta_0 e^{-C_3 \epsilon_n^2} \leq \theta \leq \theta_0\right)$$

The cumulative distribution function of inverse-gamma distribution is  $\text{Inv} - \Gamma(\{\theta \in \Theta : \theta < t\}) := \frac{\Gamma(\alpha, \frac{\beta}{t})}{\Gamma(\alpha)}$ , where  $\alpha(> 0)$  is the shape parameter,  $\beta(> 0)$  is the scale parameter,  $\Gamma(\cdot)$  is the Gamma function, and  $\Gamma(\cdot, \cdot)$  is the incomplete Gamma function. Therefore, it follows for  $\alpha > 1$  that

$$\begin{aligned} \text{Inv} - \Gamma\left(\theta_0 e^{-C_3 \epsilon_n^2} \leq \theta \leq \theta_0\right) &= \frac{\Gamma(\alpha, \beta/\theta_0) - \Gamma(\alpha, \beta/\theta_0 e^{C_3 \epsilon_n^2})}{\Gamma(\alpha)} = \frac{\int_{\beta/\theta_0}^{\beta/\theta_0 e^{C_3 \epsilon_n^2}} e^{-x} x^{\alpha-1} dx}{\Gamma(\alpha)} \\ &\geq \frac{e^{-\beta/\theta_0 e^{C_3 \epsilon_n^2}} + \alpha C_3 \epsilon_n^2}{\alpha \Gamma(\alpha)} \left(\frac{\beta}{\theta_0}\right)^\alpha \left[1 - e^{-\alpha C_3 \epsilon_n^2}\right] \\ &\geq \frac{e^{-\beta/\theta_0 e^{C_3 \epsilon_n^2}}}{\alpha \Gamma(\alpha)} \left(\frac{\beta}{\theta_0}\right)^\alpha \left[e^{-\alpha C_3 n \epsilon_n^2}\right] \end{aligned}$$

where the penultimate inequality follows since  $0 < \epsilon_n^2 < 1$  and the last inequality follows from the fact that,  $1 - e^{-\alpha C_3 \epsilon_n^2} \geq e^{-\alpha C_3 n \epsilon_n^2}$ , for large enough  $n$ . Also note that,  $1 - e^{-\alpha C_3 \epsilon_n^2} \geq e^{-\alpha C_3 n \epsilon_n^2}$  can't hold true for  $\epsilon_n^2 = 1/n$ . However, for  $\epsilon_n^2 = \frac{\log n}{n}$  it holds for any  $n \geq 2$  when  $\alpha C_3 > 2$ . Therefore, for inverse-Gamma prior restricted to  $\Theta$ ,  $C_2 = \alpha C_3$  and any  $\lambda > 1$  the result follows for sufficiently large  $n$ .  $\square$

*Proof.* Proof of Lemma B.3: Recall,

$$R(a, \theta) = ha - \frac{h}{\theta} + (b+h) \frac{e^{-a\theta}}{\theta}.$$

First, observe that for any  $a \in \mathcal{A}$ ,

$$\frac{\partial R(a, \theta)}{\partial \theta} = \frac{h}{\theta^2} - a(b+h) \frac{e^{-a\theta}}{\theta} - (b+h) \frac{e^{-a\theta}}{\theta^2} = \frac{1}{\theta^2} (h - (b+h)e^{-a\theta}(1+a\theta)). \quad (63)$$

Using the above equation the (finite) critical point  $\theta^*$  must satisfy,  $h - (b + h)e^{-a\theta^*}(1 + a\theta^*) = 0$ . Therefore,

$$R(a, \theta) \geq R(a, \theta^*) = h \left( a - \frac{1}{\theta^*} + \frac{1}{\theta^*(1 + a\theta^*)} \right) = \frac{ha^2\theta^*}{(1 + a\theta^*)}.$$

Since  $h, b > 0$  and  $a\theta^* > 0$ , hence

$$R(a, \theta) \geq \frac{h\underline{a}^2\theta^*}{(1 + a\theta^*)},$$

where  $\underline{a} := \min\{a \in \mathcal{A}\}$  and  $\underline{a} > 0$ . □

*Proof.* Proof of Lemma B.4:

First, observe that  $R(a, \theta)$  is bounded above in  $\theta$  for a given  $a \in \mathcal{A}$

$$\begin{aligned} R(a, \theta) &= ha - \frac{h}{\theta} + (b + h) \frac{e^{-a\theta}}{\theta} \\ &\leq ha + \frac{b}{\theta}. \end{aligned}$$

Using the above fact and the Cauchy-Schwarz inequality, we obtain

$$\begin{aligned} &\int_{\{e^{\gamma R(a, \theta)} > e^{C_4(\gamma)n\epsilon_n^2}\}} e^{\gamma R(a, \theta)} \pi(\theta) d\theta \\ &\leq \left( \int e^{2\gamma R(a, \theta)} \pi(\theta) d\theta \right)^{1/2} \left( \int \mathbb{1}_{e^{\gamma R(a, \theta)} > e^{C_4(\gamma)n\epsilon_n^2}} \pi(\theta) d\theta \right)^{1/2} \\ &\leq \left( \int e^{2\gamma(ha + \frac{b}{\theta})} \pi(\theta) d\theta \right)^{1/2} \left( \int \mathbb{1}_{\{e^{\gamma(ha + \frac{b}{\theta})} > e^{C_4(\gamma)n\epsilon_n^2}\}} \pi(\theta) d\theta \right)^{1/2} \\ &\leq e^{-C_4(\gamma)n\epsilon_n^2} \left( \int e^{2\gamma(ha + \frac{b}{\theta})} \pi(\theta) d\theta \right), \end{aligned} \quad (64)$$

where the last inequality follows from using the Chebyshev's inequality.

Now using the definition of the prior distribution, which is an inverse gamma prior restricted to  $\Theta = [T, \infty)$ , we have

$$\begin{aligned} \int_{\{e^{\gamma R(a, \theta)} > e^{C_4(\gamma)n\epsilon_n^2}\}} e^{\gamma R(a, \theta)} \pi(\theta) d\theta &\leq e^{-C_4(\gamma)n\epsilon_n^2} \left( \int e^{2\gamma(ha + \frac{b}{\theta})} \pi(\theta) d\theta \right) \\ &\leq e^{-C_4(\gamma)n\epsilon_n^2} e^{2\gamma(h\bar{a} + \frac{b}{T})}, \end{aligned}$$

where  $\bar{a} := \max\{a \in \mathcal{A}\}$  and  $\bar{a} > 0$ . Since  $n\epsilon_n^2 \geq 1$ , we must fix  $C_4(\gamma)$  such that  $e^{C_4(\gamma)} > e^{2\gamma(h\bar{a} + \frac{b}{T})}$ , that is  $C_4(\gamma) > 2\gamma(h\bar{a} + \frac{b}{T})$  and  $C_5(\gamma) = C_4(\gamma) - 2\gamma(h\bar{a} + \frac{b}{T})$ . □

*Proof.* Proof of Lemma B.5: Since family  $\mathcal{Q}$  contains all shifted-gamma distributions, observe that  $\{q_n(\cdot) \in \mathcal{Q}\} \forall n \geq 1$ . By definition,  $q_n(\theta) = \frac{n^n}{\theta_0^n \Gamma(n)} (\theta - T)^{n-1} e^{-n \frac{(\theta - T)}{\theta_0}}$ . Now consider the first term; using the definition of the KL divergence it follows that

$$\text{KL}(q_n(\theta) \parallel \pi(\theta)) = \int_T^\infty q_n(\theta) \log(q_n(\theta)) d\theta - \int_T^\infty q_n(\theta) \log(\pi(\theta)) d\theta. \quad (65)$$

Substituting  $q_n(\theta)$  in the first term of the equation above and expanding the logarithm term, we obtain

$$\begin{aligned} &\int_T^\infty q_n(\theta) \log(q_n(\theta)) d\theta \\ &= (n-1) \int_T^\infty \log(\theta - T) \frac{n^n}{\theta_0^n \Gamma(n)} (\theta - T)^{n-1} e^{-n \frac{(\theta - T)}{\theta_0}} d\theta - n + \log \left( \frac{n^n}{\theta_0^n \Gamma(n)} \right) \\ &= -\log \theta_0 + (n-1) \int_T^\infty \log \frac{\theta - T}{\theta_0} \frac{n^n}{\theta_0^n \Gamma(n)} (\theta - T)^{n-1} e^{-n \frac{(\theta - T)}{\theta_0}} d\theta - n + \log \left( \frac{n^n}{\Gamma(n)} \right) \end{aligned} \quad (66)$$

Now consider the second term in the equation above. Substitute  $\theta = \frac{t\theta_0}{n} + T$  into the integral, we have

$$\begin{aligned} \int_T^\infty \log \frac{\theta - T}{\theta_0} \frac{n^n}{\theta_0^n \Gamma(n)} (\theta - T)^{n-1} e^{-n \frac{\theta - T}{\theta_0}} d\theta &= \int_0^\infty \log \frac{t}{n} \frac{1}{\Gamma(n)} t^{n-1} e^{-t} dt \\ &\leq \int \left( \frac{t}{n} - 1 \right) \frac{1}{\Gamma(n)} t^{n-1} e^{-t} dt = 0. \end{aligned} \quad (67)$$

Substituting the above result into (66), we get

$$\begin{aligned} \int_T^\infty q_n(\theta) \log(q_n(\theta)) d\theta &\leq -\log \theta_0 - n + \log \left( \frac{n^n}{\Gamma(n)} \right) \\ &\leq -\log \theta_0 - n + \log \left( \frac{n^n}{\sqrt{2\pi n} n^{n-1} e^{-n}} \right) \\ &= -\log \sqrt{2\pi} \theta_0 + \frac{1}{2} \log n, \end{aligned} \quad (68)$$

where the second inequality uses the fact that  $\sqrt{2\pi n} n^{n-1} e^{-n} \leq n \Gamma(n)$ . Recall  $\pi(\theta) = \frac{\beta^\alpha}{\Gamma(\alpha)} \theta^{-\alpha-1} e^{-\frac{\beta}{\theta}}$ . Now consider the second term in (65). Using the definition of inverse-gamma prior and expanding the logarithm function, we have

$$\begin{aligned} &-\int_T^\infty q_n(\theta) \log(\pi(\theta)) d\theta \\ &= -\log \left( \frac{\beta^\alpha}{\Gamma(\alpha)} \right) + (\alpha + 1) \int_T^\infty \log \theta \frac{n^n}{\theta_0^n \Gamma(n)} (\theta - T)^{n-1} e^{-n \frac{\theta - T}{\theta_0}} d\theta + \beta \frac{n}{(n-1)\theta_0} \\ &= -\log \left( \frac{\beta^\alpha}{\Gamma(\alpha)} \right) + \int_T^\infty \log \frac{\theta}{\theta_0} \frac{n^n}{\theta_0^n \Gamma(n)} (\theta - T)^{n-1} e^{-n \frac{\theta - T}{\theta_0}} d\theta \\ &\quad + \beta \frac{n}{(n-1)\theta_0} + (\alpha + 1) \log \theta_0 \\ &\leq -\log \left( \frac{\beta^\alpha}{\Gamma(\alpha)} \right) + \int_T^\infty \frac{\theta - T}{\theta_0} \frac{n^n}{\theta_0^n \Gamma(n)} (\theta - T)^{n-1} e^{-n \frac{\theta - T}{\theta_0}} d\theta \\ &\quad + \beta \frac{n}{(n-1)\theta_0} + (\alpha + 1) \log \theta_0 \\ &= -\log \left( \frac{\beta^\alpha}{\Gamma(\alpha)} \right) + \beta \frac{n}{(n-1)\theta_0} + (\alpha + 1) \log \theta_0, \end{aligned} \quad (69)$$

where the first inequality is due to fact that  $\mathbb{E}_{q_n}[\beta/\theta] \leq \mathbb{E}_{q_n}[\beta/(\theta - T)]$  for any  $\theta > T$  and the penultimate inequality follows from the observation in (67) and the fact that  $\log \frac{\theta}{\theta_0} \leq \frac{\theta}{\theta_0} - 1 \leq \frac{\theta}{\theta_0} - \frac{T}{\theta_0}$  for any  $\theta_0 > T$ . Substituting (69) and (68) into (65) and dividing either sides by  $n$ , we obtain

$$\begin{aligned} &\frac{1}{n} \text{KL}(q_n(\theta) \parallel \pi(\theta)) \\ &\leq \frac{1}{n} \left( -\log \sqrt{2\pi} \theta_0 + \frac{1}{2} \log n - \log \left( \frac{\beta^\alpha}{\Gamma(\alpha)} \right) + \beta \frac{n}{(n-1)\theta_0} + (\alpha + 1) \log \theta_0 \right) \\ &= \frac{1}{2} \frac{\log n}{n} + \beta \frac{1}{(n-1)\theta_0} + \frac{1}{n} \left( -\log \sqrt{2\pi} - \log \left( \frac{\beta^\alpha}{\Gamma(\alpha)} \right) + (\alpha) \log \theta_0 \right). \end{aligned} \quad (70)$$

Now consider the second term in the assertion of the lemma. Since  $\xi_i, i \in \{1, 2 \dots n\}$  are independent and identically distributed, we obtain

$$\frac{1}{n} \mathbb{E}_{q_n(\theta)} \left[ \text{KL} \left( dP_0^n \parallel p(\tilde{X}_n | \theta) \right) \right] = \mathbb{E}_{q_n(\theta)} \left[ \text{KL} \left( dP_0 \parallel p(\xi | \theta) \right) \right]$$

Now using the expression for KL divergence between the two exponential distributions, we have

$$\begin{aligned} \frac{1}{n} \mathbb{E}_{q_n(\theta)} \left[ \text{KL} \left( dP_0^n \parallel p(\tilde{X}_n | \theta) \right) \right] &= \int_T^\infty \left( \log \frac{\theta_0}{\theta} + \frac{\theta}{\theta_0} - 1 \right) \frac{n^n}{\theta_0^n \Gamma(n)} (\theta - T)^{n-1} e^{-n \frac{\theta - T}{\theta_0}} d\theta \\ &\leq \frac{n}{n-1} + 1 - 2 = \frac{1}{n-1}, \end{aligned} \quad (71)$$

where second inequality uses the fact that  $\log x \leq x - 1 \leq x - \frac{T}{\theta_0}$  for  $\theta_0 > T$ . Combined together (71) and (70) for  $n \geq 2$  implies that

$$\begin{aligned} & \frac{1}{n} \left[ \text{KL}(q_n(\theta) \parallel \pi(\theta)) + \mathbb{E}_{q_n(\theta)} \left[ \text{KL}(dP_0^n \parallel p(\tilde{X}_n | \theta)) \right] \right] \\ & \leq \frac{1}{2} \frac{\log n}{n} + \frac{1}{n} \left( 2 + \frac{2\beta}{\theta_0} - \log \sqrt{2\pi} - \log \left( \frac{\beta^\alpha}{\Gamma(\alpha)} \right) + \alpha \log \theta_0 \right) \leq C_9 \frac{\log n}{n}. \end{aligned} \quad (72)$$

where  $C_9 := \frac{1}{2} + \max \left( 0, 2 + \frac{2\beta}{\theta_0} - \log \sqrt{2\pi} - \log \left( \frac{\beta^\alpha}{\Gamma(\alpha)} \right) + \alpha \log \theta_0 \right)$  and the result follows.  $\square$

*Proof.* Proof of Lemma B.5: Since family  $\mathcal{Q}$  contains all gamma distributions, observe that  $\{q_n(\cdot) \in \mathcal{Q}\} \forall n \geq 1$ . By definition,  $q_n(\theta) = \frac{n^n}{\theta_0^n \Gamma(n)} \theta^{n-1} e^{-n \frac{\theta}{\theta_0}}$ . Now consider the first term; using the definition of the KL divergence it follows that

$$\text{KL}(q_n(\theta) \parallel \pi(\theta)) = \int q_n(\theta) \log(q_n(\theta)) d\theta - \int q_n(\theta) \log(\pi(\theta)) d\theta. \quad (73)$$

Substituting  $q_n(\theta)$  in the first term of the equation above and expanding the logarithm term, we obtain

$$\begin{aligned} \int q_n(\theta) \log(q_n(\theta)) d\theta &= (n-1) \int \log \theta \frac{n^n}{\theta_0^n \Gamma(n)} \theta^{n-1} e^{-n \frac{\theta}{\theta_0}} d\theta - n + \log \left( \frac{n^n}{\theta_0^n \Gamma(n)} \right) \\ &= -\log \theta_0 + (n-1) \int \log \frac{\theta}{\theta_0} \frac{n^n}{\theta_0^n \Gamma(n)} \theta^{n-1} e^{-n \frac{\theta}{\theta_0}} d\theta - n + \log \left( \frac{n^n}{\Gamma(n)} \right) \end{aligned} \quad (74)$$

Now consider the second term in the equation above. Substitute  $\theta = \frac{t\theta_0}{n}$  into the integral, we have

$$\begin{aligned} \int \log \frac{\theta}{\theta_0} \frac{n^n}{\theta_0^n \Gamma(n)} \theta^{n-1} e^{-n \frac{\theta}{\theta_0}} d\theta &= \int \log \frac{t}{n} \frac{1}{\Gamma(n)} t^{n-1} e^{-t} dt \\ &\leq \int \left( \frac{t}{n} - 1 \right) \frac{1}{\Gamma(n)} t^{n-1} e^{-t} dt = 0. \end{aligned} \quad (75)$$

Substituting the above result into (74), we get

$$\begin{aligned} \int q_n(\theta) \log(q_n(\theta)) d\theta &\leq -\log \theta_0 - n + \log \left( \frac{n^n}{\Gamma(n)} \right) \\ &\leq -\log \theta_0 - n + \log \left( \frac{n^n}{\sqrt{2\pi n n^{n-1} e^{-n}}} \right) \\ &= -\log \sqrt{2\pi} \theta_0 + \frac{1}{2} \log n, \end{aligned} \quad (76)$$

where the second inequality uses the fact that  $\sqrt{2\pi n n^{n-1} e^{-n}} \leq n \Gamma(n)$ . Recall  $\pi(\theta) = \frac{\beta^\alpha}{\Gamma(\alpha)} \theta^{-\alpha-1} e^{-\frac{\beta}{\theta}}$ . Now consider the second term in (73). Using the definition of inverse-gamma prior and expanding the logarithm function, we have

$$\begin{aligned} & - \int q_n(\theta) \log(\pi(\theta)) d\theta \\ &= -\log \left( \frac{\beta^\alpha}{\Gamma(\alpha)} \right) + (\alpha+1) \int \log \theta \frac{n^n}{\theta_0^n \Gamma(n)} \theta^{n-1} e^{-n \frac{\theta}{\theta_0}} d\theta + \beta \frac{n}{(n-1)\theta_0} \\ &= -\log \left( \frac{\beta^\alpha}{\Gamma(\alpha)} \right) + (\alpha+1) \int \log \frac{\theta}{\theta_0} \frac{n^n}{\theta_0^n \Gamma(n)} \theta^{n-1} e^{-n \frac{\theta}{\theta_0}} d\theta \\ &\quad + \beta \frac{n}{(n-1)\theta_0} + (\alpha+1) \log \theta_0 \\ &\leq -\log \left( \frac{\beta^\alpha}{\Gamma(\alpha)} \right) + \beta \frac{n}{(n-1)\theta_0} + (\alpha+1) \log \theta_0, \end{aligned} \quad (77)$$

where the last inequality follows from the observation in (75). Substituting (77) and (76) into (73) and dividing either sides by  $n$ , we obtain

$$\begin{aligned} & \frac{1}{n} \text{KL}(q_n(\theta) \| \pi(\theta)) \\ & \leq \frac{1}{n} \left( -\log \sqrt{2\pi} \theta_0 + \frac{1}{2} \log n - \log \left( \frac{\beta^\alpha}{\Gamma(\alpha)} \right) + \beta \frac{n}{(n-1)\theta_0} + (\alpha+1) \log \theta_0 \right) \\ & = \frac{1}{2} \frac{\log n}{n} + \beta \frac{1}{(n-1)\theta_0} + \frac{1}{n} \left( -\log \sqrt{2\pi} - \log \left( \frac{\beta^\alpha}{\Gamma(\alpha)} \right) + (\alpha) \log \theta_0 \right). \end{aligned} \quad (78)$$

Now, consider the second term in the assertion of the lemma. Since,  $\xi_i, i \in \{1, 2, \dots, n\}$  are independent and identically distributed, we obtain

$$\frac{1}{n} \mathbb{E}_{q(\theta)} \left[ \text{KL} \left( dP_0^n \| p(\tilde{X}_n | \theta) \right) \right] = \mathbb{E}_{q_n(\theta)} \left[ \text{KL} (dP_0 \| p(\xi | \theta)) \right]$$

Now using the expression for KL divergence between the two exponential distributions, we have

$$\begin{aligned} & \frac{1}{n} \mathbb{E}_{q(\theta)} \left[ \text{KL} \left( dP_0^n \| p(\tilde{X}_n | \theta) \right) \right] = \int \left( \log \frac{\theta_0}{\theta} + \frac{\theta}{\theta_0} - 1 \right) \frac{n^n}{\theta_0^n \Gamma(n)} \theta^{n-1} e^{-n \frac{\theta}{\theta_0}} d\theta \\ & \leq \frac{n}{n-1} + 1 - 2 = \frac{1}{n-1}, \end{aligned} \quad (79)$$

where second inequality uses the fact that  $\log x \leq x - 1$ . Combined together (79) and (78) for  $n \geq 2$  implies that

$$\begin{aligned} & \frac{1}{n} \left[ \text{KL} (q(\theta) \| \pi(\theta)) + \mathbb{E}_{q(\theta)} \left[ \text{KL} \left( dP_0^n \| p(\tilde{X}_n | \theta) \right) \right] \right] \\ & \leq \frac{1}{2} \frac{\log n}{n} + \frac{1}{n} \left( 2 + \frac{2\beta}{\theta_0} - \log \sqrt{2\pi} - \log \left( \frac{\beta^\alpha}{\Gamma(\alpha)} \right) + \alpha \log \theta_0 \right) \leq C_9 \frac{\log n}{n}. \end{aligned} \quad (80)$$

where  $C_9 := \frac{1}{2} + \max \left( 0, 2 + \frac{2\beta}{\theta_0} - \log \sqrt{2\pi} - \log \left( \frac{\beta^\alpha}{\Gamma(\alpha)} \right) + \alpha \log \theta_0 \right)$  and the result follows.  $\square$

### C.7 Multi-product Newsvendor problem

In the multi-dimensional newsvendor problem, we fix  $n^{-1/2} \sqrt{L_n^{MNV}(\theta, \theta_0)} = (\sup_{a \in \mathcal{A}} |R(a, \theta) - R(a, \theta_0)|)$ , where  $R(a, \theta) = \sum_{i=1}^d \left[ (h_i + b_i) a_i \Phi(a_i) - b_i a_i + \theta_i (b_i - h_i) + \sigma_{ii} \left[ h \frac{\phi((a_i - \theta_i)/\sigma_{ii})}{\Phi((a_i - \theta_i)/\sigma_{ii})} + b \frac{\phi((a_i - \theta_i)/\sigma_{ii})}{1 - \Phi((a_i - \theta_i)/\sigma_{ii})} \right] \right]$ .

For brevity, we denote  $d_L^{MNV}(\theta, \theta_0) = n^{-1/2} \sqrt{L_n^{MNV}(\theta, \theta_0)}$ . First, we show that

**Lemma C.13.** *For any compact decision space  $\mathcal{A}$  and compact model space  $\Theta$ ,*

$$d_L^{MNV}(\theta, \theta_0) \leq K \|\theta - \theta_0\|,$$

for a constant  $K$  depending on compact sets  $\mathcal{A}$  and  $\Theta$  and given  $b, h$  and  $\Sigma$ .

*Proof.* Observe that

$$\begin{aligned} & \partial_{\theta_i} R(a, \theta) \\ & = (b_i - h_i) + (a_i - \theta_i)/\sigma_{ii} \phi((a_i - \theta_i)/\sigma_{ii}) \left[ \frac{h}{\Phi((a_i - \theta_i)/\sigma_{ii})} + \frac{b}{1 - \Phi((a_i - \theta_i)/\sigma_{ii})} \right] \\ & + \sigma_{ii} \phi \left( \frac{(a_i - \theta_i)}{\sigma_{ii}} \right) \left[ \frac{h \phi((a_i - \theta_i)/\sigma_{ii})}{\sigma_{ii} \Phi((a_i - \theta_i)/\sigma_{ii})^2} - \frac{b \phi((a_i - \theta_i)/\sigma_{ii})}{\sigma_{ii} (1 - \Phi((a_i - \theta_i)/\sigma_{ii}))^2} \right] \\ & = (b_i - h_i) + (a_i - \theta_i)/\sigma_{ii} \phi((a_i - \theta_i)/\sigma_{ii}) \left[ \frac{h}{\Phi((a_i - \theta_i)/\sigma_{ii})} + \frac{b}{1 - \Phi((a_i - \theta_i)/\sigma_{ii})} \right] \\ & + \phi \left( \frac{(a_i - \theta_i)}{\sigma_{ii}} \right) \left[ \frac{h \phi((a_i - \theta_i)/\sigma_{ii})}{\Phi((a_i - \theta_i)/\sigma_{ii})^2} - \frac{b \phi((a_i - \theta_i)/\sigma_{ii})}{(1 - \Phi((a_i - \theta_i)/\sigma_{ii}))^2} \right]. \end{aligned} \quad (81)$$

Since,  $\mathcal{A}$  and  $\Theta$  are compact sets, therefore  $\{(a_i - \theta_i)/\sigma_{ii}\}_{i=1}^d$  lie in a compact set. Consequently,  $\phi((a_i - \theta_i)/\sigma_{ii})$  and  $\Phi((a_i - \theta_i)/\sigma_{ii})$  also lie in bounded subset of  $\mathbb{R}$  and thus  $\sup_{\mathcal{A}, \Theta} \|\partial_{\theta_i} R(a, \theta)\| \leq K$  for a given  $b, h$  and  $\Sigma$ . Since, the norm of the derivative of  $R(a, \theta)$  is bounded on  $\Theta$  for any  $a \in \mathcal{A}$ , therefore,  $d_L^{MNV}(\theta, \theta_0)$  is uniformly Lipschitz in  $\mathcal{A}$  with Lipschitz constant  $K$ , that is

$$d_L^{MNV}(\theta, \theta_0) \leq K \|\theta - \theta_0\|.$$

□

Next, we show that the  $P_\theta$  satisfies Assumption 2.1, for distance function  $L_n^{MNV}(\theta, \theta_0)$ .

*Proof.* Proof of Lemma B.6:

First consider the following test function, constructed using  $\tilde{X}_n = \{\xi_1, \xi_2, \dots, \xi_n\}$ .

$$\phi_{n,\epsilon} := \mathbb{1}_{\{\tilde{X}_n : \|\hat{\theta}_n - \theta_0\| > \sqrt{C\epsilon^2}\}},$$

where  $\hat{\theta}_n = \frac{\sum_{i=1}^n \xi_i}{n}$ . Note that  $\hat{\theta}_n - \theta_0 \sim \mathcal{N}(\cdot | 0, \frac{1}{n}\Sigma)$ , where  $\frac{1}{n}\Sigma$  is a symmetric positive definite matrix. Therefore it can be decomposed as  $\Sigma = Q^T \Lambda Q$ , where  $Q$  is an orthogonal matrix and  $\Lambda$  is a diagonal matrix consisting of respective eigen values and consequently  $\hat{\theta}_n - \theta_0 \sim Q\mathcal{N}(\cdot | 0, \frac{1}{n}\Lambda)$ . So, we have  $\|\hat{\theta}_n - \theta_0\|^2 \sim \|\mathcal{N}(\cdot | 0, \frac{1}{n}\Lambda)\|^2$ . Notice that  $\|\mathcal{N}(\cdot | 0, \frac{1}{n}\Lambda)\|^2$  is a linear combination of  $d\chi_{(1)}^2$  random variable weighted by elements of the diagonal matrix  $\frac{1}{n}\Lambda$ . Using this observation, we first verify that  $\phi_{n,\epsilon}$  satisfies condition (i) of the Lemma. Observe that

$$\mathbb{E}_{P_0^n}[\phi_n] = P_0^n \left( \tilde{X}_n : \|\hat{\theta}_n - \theta_0\|^2 > C\epsilon^2 \right) = P_0^n \left( \tilde{X}_n : \|\mathcal{N}(\cdot | 0, \Lambda)\|^2 > Cn\epsilon^2 \right).$$

Note that  $\chi_{(1)}^2$  is  $\Gamma$  distributed with shape  $1/2$  and scale  $2$ , which implies  $\chi_{(1)}^2 - 1$  is a sub-gamma random variable with scale factor  $2$  and variance factor  $2$ . Now observe that for  $\hat{\Lambda} = \max_{i \in \{1, 2, \dots, d\}} \Lambda_{ii}$ ,

$$\begin{aligned} P_0^n \left( \tilde{X}_n : \|\mathcal{N}(\cdot | 0, \Lambda)\|^2 > Cn\epsilon^2 \right) &\leq P_0^n \left( \tilde{X}_n : \chi_{(1)}^2 > \frac{1}{d\hat{\Lambda}} Cn\epsilon^2 \right) \\ &\leq P_0^n \left( \tilde{X}_n : \chi_{(1)}^2 > \frac{1}{d\hat{\Lambda}} Cn\epsilon^2 \right) \\ &= P_0^n \left( \tilde{X}_n : \chi_{(1)}^2 - 1 > \frac{1}{d\hat{\Lambda}} Cn\epsilon^2 - 1 \right) \\ &\leq e^{-\frac{(\frac{1}{d\hat{\Lambda}} Cn\epsilon^2 - 1)^2}{2(2 + 2(\frac{1}{d\hat{\Lambda}} Cn\epsilon^2 - 1))}} \\ &\leq e^{-1/8 \frac{1}{d\hat{\Lambda}} Cn\epsilon^2 + 1/8} \leq e^{-1/8 (\frac{C}{d\hat{\Lambda}} - 1)n\epsilon^2}, \end{aligned} \quad (82)$$

where in the third inequality we used the well known tail bound for sub-gamma random variable (Lemma 3.12 [5]) assuming that  $C$  is sufficiently large such that  $(\frac{1}{d\hat{\Lambda}} Cn\epsilon^2 - 1) > 1$  and in the last inequality follows from the assumption that  $n\epsilon^2 > n\epsilon_n^2 \geq 1$ .

Now, we fix the alternate set to be  $\{\theta \in \mathbb{R}^d : \|\theta - \theta_0\| \geq 2\sqrt{C\epsilon^2}\}$ . Next, we verify that  $\phi_{n,\epsilon}$  satisfies condition (ii) of the lemma. First, observe that

$$\mathbb{E}_{P_\theta^n}[1 - \phi_n] = P_\theta^n \left( \tilde{X}_n : \|\hat{\theta}_n - \theta_0\|^2 \leq C\epsilon^2 \right) \leq P_\theta^n \left( \tilde{X}_n : \|\hat{\theta}_n - \theta\| \geq \|\theta - \theta_0\| - \sqrt{C\epsilon^2} \right), \quad (83)$$

where in the last inequality, we used the fact that  $\|\theta - \theta_0\| \leq \|\hat{\theta}_n - \theta\| + \|\hat{\theta}_n - \theta_0\|$ . Now on alternate set  $\{\theta \in \mathbb{R}^d : \|\theta - \theta_0\| \geq 2\sqrt{C\epsilon^2}\}$ ,

$$\begin{aligned} \mathbb{E}_{P_\theta^n}[1 - \phi_n] &\leq P_\theta^n \left( \tilde{X}_n : \|\hat{\theta}_n - \theta\| \geq \|\theta - \theta_0\| - \sqrt{C\epsilon^2} \right) \\ &\leq P_\theta^n \left( \tilde{X}_n : \|\hat{\theta}_n - \theta\| \geq \|\theta - \theta_0\| - \sqrt{C\epsilon^2} \right) \\ &\leq P_\theta^n \left( \tilde{X}_n : \|\hat{\theta}_n - \theta\| \geq \sqrt{C\epsilon^2} \right). \end{aligned} \quad (84)$$

Now, it follows from (82) and  $\Theta \subset \mathbb{R}^d$  that

$$\begin{aligned} \mathbb{E}_{P_0^n}[\phi_n] &\leq e^{-1/8(\frac{C}{d\Lambda}-1)n\epsilon^2}, \\ \sup_{\{\theta \in \Theta: \|\theta - \theta_0\| \geq 2\sqrt{C\epsilon^2}\}} \mathbb{E}_{P_\theta^n}[1 - \phi_n] &\leq \sup_{\{\theta \in \mathbb{R}^d: \|\theta - \theta_0\| \geq 2\sqrt{C\epsilon^2}\}} \mathbb{E}_{P_\theta^n}[1 - \phi_n] \leq e^{-1/8(\frac{C}{d\Lambda}-1)n\epsilon^2}. \end{aligned}$$

Using Lemma C.13,  $\{\theta \in \Theta : n^{-1/2} \sqrt{L_n^{MNV}(\theta, \theta_0)} \geq 2K\sqrt{C\epsilon^2}\} = \{\theta \in \Theta : d_L^{MNV}(\theta, \theta_0) \geq 2K\sqrt{C\epsilon^2}\} \subseteq \{\theta \in \Theta : \|\theta - \theta_0\| \geq 2\sqrt{C\epsilon^2}\}$ , which implies that

$$\sup_{\{\theta \in \Theta: L_n^{MNV}(\theta, \theta_0) \geq 4K^2 C n \epsilon^2\}} \mathbb{E}_{P_\theta^n}[1 - \phi_n] \leq \sup_{\{\theta \in \Theta: \|\theta - \theta_0\| \geq 2\sqrt{C\epsilon^2}\}} \mathbb{E}_{P_\theta^n}[1 - \phi_n].$$

Therefore,  $P_\theta$  for  $\theta \in \Theta$ , satisfies Assumptions 2.1 for  $L_n(\theta, \theta_0) = L_n^{MNV}(\theta, \theta_0)$  for  $C_0 = 1$ ,  $C_1 = 4K^2 C$  and  $C = 1/8 \left( \frac{C}{d\Lambda} - 1 \right)$ .  $\square$

*Proof.* Proof of Lemma B.7:

First, we write the Rényi divergence between two multivariate Gaussian distribution with known  $\Sigma$  as

$$D_{1+\lambda}(\mathcal{N}(\cdot|\theta_0) \|\mathcal{N}(\cdot|\theta)) = \frac{\lambda+1}{2}(\theta - \theta_0)^T \Sigma (\theta - \theta_0), \quad (85)$$

and  $D_{1+\lambda}(\mathcal{N}(\cdot|\theta) \|\mathcal{N}(\cdot|\theta_0)) < \infty$  if and only if  $\Sigma^{-1}$  is positive definite [13].

Since, we assumed that the sequence of models are iid, therefore,  $D_{1+\lambda}(P_0^n \| P_\theta^n) = \frac{1}{\lambda} \log \int \left( \frac{dP_0^n}{dP_\theta^n} \right)^\lambda dP_0^n = n \frac{1}{\lambda} \log \int \left( \frac{dP_0}{dP_\theta} \right)^\lambda dP_0 = n \left( \frac{\lambda+1}{2} (\theta - \theta_0)^T \Sigma (\theta - \theta_0) \right)$ , when  $\Sigma^{-1}$  is positive definite and  $D_{1+\lambda}(P_0^n \| P_\theta^n) = \infty$  otherwise. Now observe that

$$\begin{aligned} \Pi(D_{1+\lambda}(P_0^n \| P_\theta^n) \leq nC_3\epsilon_n^2) &= \Pi\left( ((\theta - \theta_0)^T \Sigma (\theta - \theta_0)) \leq \frac{2}{\lambda+1} C_3\epsilon_n^2 \right) \\ &= \Pi\left( ([(\theta - \theta_0)Q]^T \Lambda [Q(\theta - \theta_0)]) \leq \frac{2}{\lambda+1} C_3\epsilon_n^2 \right) \\ &\geq \Pi\left( ([(\theta - \theta_0)Q]^T [Q(\theta - \theta_0)]) \leq \frac{2}{\hat{\Lambda}(\lambda+1)} C_3\epsilon_n^2 \right), \\ &= \Pi\left( ([(\theta - \theta_0)]^T [(\theta - \theta_0)]) \leq \frac{2}{\hat{\Lambda}(\lambda+1)} C_3\epsilon_n^2 \right), \end{aligned} \quad (86)$$

where  $\hat{\Lambda} = \max_{i \in \{1, 2, \dots, d\}} \Lambda_{ii}$  and in the second equality we used eigen value decomposition of  $\Sigma = Q^T \Lambda Q$ . Next, observe that,

$$\begin{aligned} \Pi(D_{1+\lambda}(P_0^n \| P_\theta^n) \leq nC_3\epsilon_n^2) &= \Pi\left( ([(\theta - \theta_0)]^T [(\theta - \theta_0)]) \leq \frac{2}{\hat{\Lambda}(\lambda+1)} C_3\epsilon_n^2 \right) \\ &= \Pi\left( \|\theta - \theta_0\| \leq \sqrt{\frac{2}{\hat{\Lambda}(\lambda+1)} C_3\epsilon_n^2} \right) \\ &\geq \Pi\left( \|\theta - \theta_0\|_\infty \leq \sqrt{\frac{2}{\hat{\Lambda}(\lambda+1)} C_3\epsilon_n^2} \right) \\ &= \prod_{i=1}^d \Pi_i\left( |(\theta_i - \theta_0^i)| \leq \sqrt{\frac{2}{\hat{\Lambda}(\lambda+1)} C_3\epsilon_n^2} \right), \end{aligned}$$

where in the last equality we used the fact that the prior distribution is uncorrelated. Now, the result follows immediately for sufficiently large  $n$ , if the prior distribution is uncorrelated and uniformly

distributed on the compact set  $\Theta_i$ , for each  $i \in \{1, 2, \dots, d\}$ . In particular observe that for large enough  $n$ , we have

$$\begin{aligned} \Pi(D_{1+\lambda}(P_0^n \| P_\theta^n) \leq nC_3\epsilon_n^2) &\geq \prod_{i=1}^d \frac{\theta_0^i + \sqrt{\frac{2}{\hat{\lambda}(\lambda+1)}C_3\epsilon_n^2} - \theta_0^i + \sqrt{\frac{2}{\hat{\lambda}(\lambda+1)}C_3\epsilon_n^2}}{m(\Theta_i)} \\ &= \frac{2^d \left(\frac{2}{\hat{\lambda}(\lambda+1)}C_3\epsilon_n^2\right)^{d/2}}{\prod_{i=1}^d m(\Theta_i)} = \left(\frac{8}{(\hat{\lambda}(\lambda+1))} \left(\prod_{i=1}^d m(\Theta_i)\right)^{-2/d} C_3\epsilon_n^2\right)^{d/2}, \end{aligned}$$

where  $m(A)$  is the Lebesgue measure (volume) of any set  $A \subset \mathbb{R}$ . Now if  $\epsilon_n^2 = \frac{\log n}{n}$ , then for  $\frac{8}{\hat{\lambda}(\lambda+1)(\prod_{i=1}^d m(\Theta_i))^{2/d}} C_3 > 2$ ,  $\frac{8}{\hat{\lambda}(\lambda+1)(\prod_{i=1}^d m(\Theta_i))^{2/d}} C_3\epsilon_n^2 \geq e^{-\frac{8}{\hat{\lambda}(\lambda+1)(\prod_{i=1}^d m(\Theta_i))^{2/d}} C_3 n \epsilon_n^2}$  for all  $n \geq 2$ , therefore,

$$\Pi(D_{1+\lambda}(P_0^n \| P_\theta^n) \leq nC_3\epsilon_n^2) \geq e^{-\frac{4d}{\hat{\lambda}(\lambda+1)(\prod_{i=1}^d m(\Theta_i))^{2/d}} C_3 n \epsilon_n^2}.$$

□

*Proof.* Proof of Lemma B.9: Since family  $\mathcal{Q}$  contains all uncorrelated Gaussian distributions restricted to  $\Theta$ , observe that  $\{q_n(\cdot) \in \mathcal{Q}\} \forall n \geq 1$ . By definition,  $q_n^i(\theta) \propto \frac{1}{\sqrt{2\pi\sigma_{i,n}^2}} e^{-\frac{1}{2\sigma_{i,n}^2}(\theta - \mu_{i,n})^2} \mathbb{1}_{\Theta_i} = \frac{\mathcal{N}(\theta_i | \mu_{i,n}, \sigma_{i,n}) \mathbb{1}_{\Theta_i}}{\mathcal{N}(\Theta_i | \mu_{i,n}, \sigma_{i,n})}$  and fix  $\sigma_{i,n} = 1/\sqrt{n}$  and  $\theta_i = \theta_0^i$  for all  $i \in \{1, 2, \dots, d\}$ . Now consider the first term; using the definition of the KL divergence it follows that

$$\text{KL}(q_n(\theta) \| \pi(\theta)) = \int q_n(\theta) \log(q_n(\theta)) d\theta - \int q_n(\theta) \log(\pi(\theta)) d\theta. \quad (87)$$

Substituting  $q_n(\theta)$  in the first term of the equation above and expanding the logarithm term, we obtain

$$\begin{aligned} \int q_n(\theta) \log(q_n(\theta)) d\theta &= \sum_{i=1}^d \int q_n^i(\theta_i) \log(q_n^i(\theta_i)) d\theta_i \\ &\leq \sum_{i=1}^d \int \mathcal{N}(\theta_i | \mu_{i,n}, \sigma_{i,n}) \log \mathcal{N}(\theta_i | \mu_{i,n}, \sigma_{i,n}) d\theta_i \\ &= - \sum_{i=1}^d [\log(\sqrt{2\pi}e) + \log \sigma_{i,n}], \end{aligned} \quad (88)$$

where in the last equality, we used the well known expression for the differential entropy of Gaussian distributions. Recall  $\pi(\theta) = \prod_{i=1}^d \frac{1}{m(\Theta_i)}$ . Now consider the second term in (87). It is straightforward to observe that,

$$- \int q_n(\theta) \log(\pi(\theta)) d\theta = \sum_{i=1}^d \log(m(\Theta_i)). \quad (89)$$

Substituting (89) and (88) into (87) and dividing either sides by  $n$  and substituting  $\sigma_{i,n}$ , we obtain

$$\begin{aligned} \frac{1}{n} \text{KL}(q_n(\theta) \| \pi(\theta)) &\leq -\frac{1}{n} \sum_{i=1}^d [\log(\sqrt{2\pi}e) - \log(m(\Theta_i)) - \frac{1}{2} \log n] \\ &= \frac{d \log n}{2n} - \frac{1}{n} \sum_{i=1}^d [\log(\sqrt{2\pi}e) - \log(m(\Theta_i))]. \end{aligned} \quad (90)$$

Now, consider the second term in the assertion of the lemma. Since  $\xi_i, i \in \{1, 2 \dots n\}$  are independent and identically distributed, we obtain

$$\frac{1}{n} \mathbb{E}_{q_n(\theta)} [\text{KL}(dP_0^n \| p(\tilde{X}_n | \theta))] = \mathbb{E}_{q_n(\theta)} [\text{KL}(dP_0 \| p(\xi | \theta))]$$

Now using the expression for KL divergence between the two multivariate Gaussian distributions, we have

$$\begin{aligned} \frac{1}{n} \mathbb{E}_{q_n(\theta)} \left[ \text{KL} \left( dP_0^n \| p(\tilde{X}_n | \theta) \right) \right] &= \frac{1}{2} \mathbb{E}_{q_n(\theta)} \left[ (\theta - \theta_0)^T \Sigma^{-1} (\theta - \theta_0) \right] \\ &\leq \frac{\tilde{\Lambda}^{-1}}{2} \mathbb{E}_{q_n(\theta)} \left[ (\theta - \theta_0)^T (\theta - \theta_0) \right] \\ &\leq \frac{d \tilde{\Lambda}^{-1}}{n \cdot 2} \end{aligned} \quad (91)$$

where  $\tilde{\Lambda} = \min_{i \in \{1, 2, \dots, d\}} \Lambda_{ii}$ , and  $\Sigma^{-1} = Q^T \Lambda^{-1} Q$ , where  $Q$  is an orthogonal matrix and  $\Lambda$  is a diagonal matrix consisting of the respective eigen values of  $\Sigma$ . Combined together (91) and (90) implies that

$$\begin{aligned} &\frac{1}{n} \left[ \text{KL} (q_n(\theta) \| \pi(\theta)) + \mathbb{E}_{q_n(\theta)} \left[ \text{KL} \left( dP_0^n \| p(\tilde{X}_n | \theta) \right) \right] \right] \\ &\leq \frac{d \log n}{2 \cdot n} - \frac{1}{n} \sum_{i=1}^d [\log(\sqrt{2\pi e}) - \log(m(\Theta_i))] + \frac{d \tilde{\Lambda}^{-1}}{n \cdot 2} \leq C_9 \frac{\log n}{n}. \end{aligned} \quad (92)$$

where  $C_9 := \frac{d}{2} + \max \left( 0, -\sum_{i=1}^d [\log(\sqrt{2\pi e}) - \log(m(\Theta_i))] + \frac{d \tilde{\Lambda}^{-1}}{2} \right)$  and the result follows.  $\square$

### C.8 Gaussian process classification

*Proof of Lemma B.11.* In view of Theorem 7.1 in [11], it suffices to show that

$$N(\epsilon, \Theta_n(\epsilon), d_{\text{TV}}) \leq e^{\bar{C} n \epsilon^2},$$

for some  $\bar{C} > 0$ . Now, first observe that

$$\begin{aligned} d_{\text{TV}}(P_{\theta(y)}, P_{\theta_0(y)}) &= \frac{1}{2} \mathbb{E}_\nu (|\Psi_1(\theta(y)) - \Psi_1(\theta_0(y))| + |\Psi_{-1}(\theta(y)) - \Psi_{-1}(\theta_0(y))|) \\ &= \mathbb{E}_\nu (|\Psi_1(\theta(y)) - \Psi_1(\theta_0(y))|) \\ &\leq \mathbb{E}_\nu (|\theta(y) - \theta_0(y)|) \leq \|\theta(y) - \theta_0(y)\|_\infty, \end{aligned} \quad (93)$$

where the second equality uses the definition of  $\Psi_{-1}(\cdot)$ . Since, total-variation distance above is bounded above by supremum norm, there exists a constant  $0 < c' < 1/2$ , such that

$$N(\epsilon, \Theta_n(\epsilon), d_{\text{TV}}) \leq N(c'\epsilon, \Theta_n(\epsilon), \|\cdot\|_\infty) \leq e^{\frac{2}{3} c'^2 C_{10} n \epsilon^2}, \quad (94)$$

where the last inequality follows from (13) in Lemma B.10. Then it follows from Theorem 7.1 in [11] that for every  $\epsilon > \epsilon_n$ , there exists a test  $\phi_n$  (depending on  $\epsilon > 0$ ) such that, for every  $j \geq 1$ ,

$$\mathbb{E}_{P_0^n}[\phi_n] \leq e^{\frac{2}{3} c'^2 C_{10} n \epsilon^2} e^{-\frac{1}{2} n \epsilon^2} \frac{1}{1 - \exp(-\frac{1}{2} n \epsilon^2)}, \text{ and}$$

$$\sup_{\{\theta \in \Theta_n(\epsilon) : d_{\text{TV}}(P_\theta, P_{\theta_0}) > j\epsilon\}} \mathbb{E}_{P_\theta^n}[1 - \phi_n] \leq \exp\left(-\frac{1}{2} n \epsilon^2 j\right).$$

Now for all  $n$  such that  $n \epsilon^2 > n \epsilon_n^2 > 2 \log 2$  and  $C_{10} = c'^{-2}/4 > 1$  and  $j = 1$ , we have

$$\mathbb{E}_{P_0^n}[\phi_n] \leq 2e^{-\frac{1}{3} n \epsilon^2}, \text{ and} \quad (95)$$

$$\sup_{\{\theta \in \Theta_n(\epsilon) : d_{\text{TV}}(P_\theta, P_{\theta_0}) > \epsilon\}} \mathbb{E}_{P_\theta^n}[1 - \phi_n] \leq e^{-\frac{1}{2} n \epsilon^2} \leq e^{-\frac{1}{3} n \epsilon^2}. \quad (96)$$

Now observe that

$$\begin{aligned} &\sup_{a \in \mathcal{A}} |G(a, \theta) - G(a, \theta_0)| \\ &= \max(c_+ |\mathbb{E}_\nu[\Psi_{-1}(\theta(y))] - \mathbb{E}_\nu[\Psi_{-1}(\theta_0(y))]|, c_- |\mathbb{E}_\nu[\Psi_1(\theta(y))] - \mathbb{E}_\nu[\Psi_1(\theta_0(y))]|) \\ &= \max(c_+ |\mathbb{E}_\nu[\Psi_1(\theta_0(y))] - \mathbb{E}_\nu[\Psi_1(\theta(y))]|, c_- |\mathbb{E}_\nu[\Psi_1(\theta(y))] - \mathbb{E}_\nu[\Psi_1(\theta_0(y))]|) \\ &= \max(c_+, c_-) |\mathbb{E}_\nu[\Psi_1(\theta_0(y))] - \mathbb{E}_\nu[\Psi_1(\theta(y))]| \\ &\leq \max(c_+, c_-) \mathbb{E}_\nu[|\Psi_1(\theta_0(y)) - \Psi_1(\theta(y))|] \\ &\leq \max(c_+, c_-) d_{\text{TV}}(P_\theta, P_{\theta_0}) \end{aligned} \quad (97)$$

where the second equality uses the fact that  $\Psi_{-1}(\cdot) = 1 - \Psi_1(\cdot)$ .

Consequently,

$$\{\theta \in \Theta_n(\epsilon) : \sup_{a \in \mathcal{A}} |G(a, \theta) - G(a, \theta_0)| > \max(c_+, c_-)\epsilon\} \subseteq \{\theta \in \Theta_n(\epsilon) : d_{TV}(P_\theta, P_{\theta_0}) > \epsilon\}$$

Therefore, it follows from (95) and (96) and the definition of  $L_n(\theta, \theta_0)$  that

$$\mathbb{E}_{P_0^n}[\phi_n] \leq 2e^{-\frac{1}{3}n\epsilon^2}, \text{ and} \quad (98)$$

$$\sup_{\{\theta \in \Theta_n(\epsilon) : L_n(\theta, \theta_0) > (\max(c_+, c_-))^2 n\epsilon^2\}} \mathbb{E}_{P_\theta^n}[1 - \phi_n] \leq e^{-\frac{1}{2}n\epsilon^2} \leq e^{-\frac{1}{3}n\epsilon^2}. \quad (99)$$

Finally, the result follows for  $C = 1/3$ ,  $C_0 = 2$  and  $C_1 = (\max(c_+, c_-))^2$ .

□

*Proof of Lemma B.12.* The Rényi divergence

$$\begin{aligned} D_{1+\lambda}(P_0^n \| P_\theta^n) &= n \frac{1}{\lambda} \ln \int (\Psi_1(\theta_0(y))^{1+\lambda} \Psi_1(\theta(y))^{-\lambda} + \Psi_{-1}(\theta_0(y))^{1+\lambda} \Psi_{-1}(\theta(y))^{-\lambda}) \nu(dy) \\ &= n \frac{1}{\lambda} \ln \int e^{\lambda \frac{1}{\lambda} \ln(\Psi_1(\theta_0(y))^{1+\lambda} \Psi_1(\theta(y))^{-\lambda} + \Psi_{-1}(\theta_0(y))^{1+\lambda} \Psi_{-1}(\theta(y))^{-\lambda})} \nu(dy). \end{aligned} \quad (100)$$

Note that the derivative of the exponent in the integrand above with respect to  $\theta(y)$  is

$$\begin{aligned} & \frac{(-\lambda \Psi_1(\theta_0(y))^{1+\lambda} \Psi_1(\theta(y))^{-\lambda-1} \psi(\theta(y)) + \lambda \Psi_{-1}(\theta_0(y))^{1+\lambda} \Psi_{-1}(\theta(y))^{-\lambda-1} \psi(\theta(y)))}{(\Psi_1(\theta_0(y))^{1+\lambda} \Psi_1(\theta(y))^{-\lambda} + \Psi_{-1}(\theta_0(y))^{1+\lambda} \Psi_{-1}(\theta(y))^{-\lambda})} \\ &= \lambda \psi(\theta(y)) \frac{(-\Psi_1(\theta_0(y))^{1+\lambda} \Psi_1(\theta(y))^{-\lambda-1} + \Psi_{-1}(\theta_0(y))^{1+\lambda} \Psi_{-1}(\theta(y))^{-\lambda-1})}{(\Psi_1(\theta_0(y))^{1+\lambda} \Psi_1(\theta(y))^{-\lambda} + \Psi_{-1}(\theta_0(y))^{1+\lambda} \Psi_{-1}(\theta(y))^{-\lambda})} \\ &= \lambda \frac{\psi(\theta(y))}{\Psi_1(\theta(y)) \Psi_{-1}(\theta(y))} \frac{(-\Psi_1(\theta_0(y))^{1+\lambda} \Psi_{-1}(\theta(y))^{\lambda+1} + \Psi_{-1}(\theta_0(y))^{1+\lambda} \Psi_1(\theta(y))^{\lambda+1})}{(\Psi_1(\theta_0(y))^{1+\lambda} \Psi_{-1}(\theta(y))^\lambda + \Psi_{-1}(\theta_0(y))^{1+\lambda} \Psi_1(\theta(y))^\lambda)} \\ &= \lambda \frac{(-\Psi_1(\theta_0(y))^{1+\lambda} \Psi_{-1}(\theta(y))^{\lambda+1} + \Psi_{-1}(\theta_0(y))^{1+\lambda} \Psi_1(\theta(y))^{\lambda+1})}{(\Psi_1(\theta_0(y))^{1+\lambda} \Psi_{-1}(\theta(y))^\lambda + \Psi_{-1}(\theta_0(y))^{1+\lambda} \Psi_1(\theta(y))^\lambda)} \\ &= \lambda \frac{(-e^{-(\lambda+1)\theta(y)} + e^{-(1+\lambda)\theta_0(y)})}{(e^{-\lambda\theta(y)} + e^{-(\lambda+1)\theta_0(y)}) (1 + e^{-\theta(y)})} \\ &= \lambda \frac{e^{-(1+\lambda)\theta_0(y)} (1 - e^{-(\lambda+1)(\theta(y) - \theta_0(y))})}{(e^{-\lambda\theta(y)} + e^{-(\lambda+1)\theta_0(y)}) (1 + e^{-\theta(y)})} \\ &\leq \lambda \frac{(\lambda+1)(\theta(y) - \theta_0(y))}{(e^{-\lambda\theta(y) + (\lambda+1)\theta_0(y)} + 1) (1 + e^{-\theta(y)})} \\ &\leq \lambda(\lambda+1)|\theta(y) - \theta_0(y)|, \end{aligned} \quad (101)$$

where in the fourth equality we used definition of the logistic function and the penultimate inequality follows from the well known inequality that  $1 - e^{-x} \leq x$ . Consequently, using Taylor's theorem it follows that the exponent in the integrand of the Rényi divergence in (100) is bounded above by  $\lambda(\lambda+1)|\theta(y) - \theta_0(y)|^2$  and thus by  $\lambda(\lambda+1)\|\theta(y) - \theta_0(y)\|_\infty^2$ . Therefore,

$$\begin{aligned} D_{1+\lambda}(P_0^n \| P_\theta^n) &= n \frac{1}{\lambda} \ln \int (\Psi_1(\theta_0(y))^{1+\lambda} \Psi_1(\theta(y))^{-\lambda} + \Psi_{-1}(\theta_0(y))^{1+\lambda} \Psi_{-1}(\theta(y))^{-\lambda}) \nu(dy) \\ &\leq n \frac{1}{\lambda} \ln \int e^{\lambda(\lambda+1)\|\theta(y) - \theta_0(y)\|_\infty^2} \nu(dy) \\ &= n(\lambda+1)\|\theta(y) - \theta_0(y)\|_\infty^2. \end{aligned}$$

Now using the inequality for  $C_3 = 16(\lambda + 1)$  above observe that

$$\begin{aligned}\Pi(A_n) &= \Pi(D_{1+\lambda}(P_0^n \| P_\theta^n) \leq C_3 n \epsilon_n^2) \\ &\geq \Pi(n(\lambda + 1) \|\theta(y) - \theta_0(y)\|_\infty^2 \leq C_3 n \epsilon_n^2) \\ &= \Pi(\|\theta(y) - \theta_0(y)\|_\infty \leq 4\epsilon_n) \geq e^{-n\epsilon_n^2}\end{aligned}\tag{102}$$

and the result follows from (15) of Lemma B.10.  $\square$

*Proof of Lemma B.13.* Let us first analyze the KL divergence between the prior distribution and variational family. Recall that two Gaussian measures on infinite dimensional spaces are either equivalent or singular. [27, Theorem 6.13] specify the condition required for the two Gaussian measures to be equivalent. In particular, note that  $\theta_0^J(\cdot) \in \text{Im}(\mathcal{C}^{1/2})$ . Now observe that the covariance operator of  $Q_n$  has eigenvalues  $\{\zeta_j^2\}_{j=1}^J 2^{jd}$ , therefore operator  $S$  in the definition of  $\mathcal{C}_q$  has eigenvalues  $\{1 - \zeta_j^2/\mu_j^2\}_{j=1}^J 2^{jd}$ . For  $\tau_j^2 = 2^{-2ja-jd}$  for any  $a > 0$ ,  $\sum_{j=1}^J 2^{jd} \left( \frac{n\epsilon_n^2 2^{-2ja-jd}}{1+n\epsilon_n^2 2^{-2ja-jd}} \right)^2 = \sum_{j=1}^J 2^{-jd} \left( \frac{n\epsilon_n^2 2^{-2ja}}{1+n\epsilon_n^2 2^{-2ja-jd}} \right)^2 < \infty$ , therefore  $S$  is an HS operator.

For any integer  $J \leq J_\alpha$  define  $\bar{\theta}_0^J = \int \theta_0^J(y) \nu(dy)$ , where  $\theta_0^J(\cdot) = \sum_{j=1}^J \sum_{k=1}^{2^{jd}} \theta_{0;j,k} \vartheta_{j,k}(\cdot)$ . Since,  $\theta_0^J(\cdot) \in \text{Im}(\mathcal{C}^{1/2})$  and  $S$  is a symmetric and HS operator, we invoke Theorem 5 in [22], to write

$$\begin{aligned}\text{KL}(\mathcal{N}(\bar{\theta}_0^J, \mathcal{C}_q) \| \mathcal{N}(0, \mathcal{C})) &= \frac{1}{2} \|\mathcal{C}^{-1/2} \bar{\theta}_0^J\|^2 - \frac{1}{2} \log \det(I - S) + \frac{1}{2} \text{tr}(-S), \\ &= \frac{1}{2} \sum_{j=1}^J \sum_{k=1}^{2^{jd}} \frac{\theta_{0;j,k}^2}{\mu_j^2} - \frac{1}{2} \log \prod_{j=1}^J \prod_{k=1}^{2^{jd}} (1 - \kappa_j^2) - \frac{1}{2} \sum_{j=1}^J \sum_{k=1}^{2^{jd}} \kappa_j^2 \\ &= \frac{1}{2} \sum_{j=1}^J \sum_{k=1}^{2^{jd}} \frac{\theta_{0;j,k}^2}{\mu_j^2} - \frac{1}{2} \log \prod_{j=1}^J (1 - \kappa_j^2)^{2^{jd}} - \frac{1}{2} \sum_{j=1}^J 2^{jd} \kappa_j^2 \\ &= \frac{1}{2} \sum_{j=1}^J \sum_{k=1}^{2^{jd}} \frac{\theta_{0;j,k}^2}{\mu_j^2} - \frac{1}{2} \sum_{j=1}^J 2^{jd} \log(1 - \kappa_j^2) - \frac{1}{2} \sum_{j=1}^J 2^{jd} \kappa_j^2.\end{aligned}$$

Now for  $\mu_j 2^{jd/2} = 2^{-ja}$ , and using the definition of Besov norm of  $\theta_0$  denoted as  $\|\theta_0\|_{\beta,\infty,\infty}^2$ , and denoting  $1 - \kappa_j^2 = \frac{1}{1+n\epsilon_n^2 \tau_j^2}$ , we have

$$\begin{aligned}\text{KL}(\mathcal{N}(\bar{\theta}_0^J, \mathcal{C}_q) \| \mathcal{N}(0, \mathcal{C})) &\leq \frac{1}{2} \sum_{j=1}^J 2^{j(2a-2\beta+d)} \|\theta_0\|_{\beta,\infty,\infty}^2 - \frac{1}{2} \sum_{j=1}^J 2^{jd} \log(1 - \kappa_j^2) - \frac{1}{2} \sum_{j=1}^J 2^{jd} \kappa_j^2 \\ &= \frac{1}{2} \sum_{j=1}^J 2^{j(2a-2\beta+d)} \|\theta_0\|_{\beta,\infty,\infty}^2 - \frac{1}{2} \sum_{j=1}^J 2^{jd} (\log(1 - \kappa_j^2) + \kappa_j^2) \\ &= \frac{1}{2} \sum_{j=1}^J 2^{j(2a-2\beta+d)} \|\theta_0\|_{\beta,\infty,\infty}^2 + \frac{1}{2} \sum_{j=1}^J 2^{jd} \left( \log(1 + n\epsilon_n^2 \tau_j^2) - \frac{n\epsilon_n^2 \tau_j^2}{1 + n\epsilon_n^2 \tau_j^2} \right) \\ &\leq \frac{1}{2} \sum_{j=1}^J 2^{j(2a-2\beta+d)} \|\theta_0\|_{\beta,\infty,\infty}^2 + \frac{1}{2} \sum_{j=1}^J 2^{jd} (n\epsilon_n^2 \tau_j^2),\end{aligned}$$

where the last inequality follows from the fact that,  $\log(1+x) - \frac{x}{1+x} \leq \frac{x^2}{1+x} \leq x$  for  $x > 0$ . Substituting  $\tau_j^2 = 2^{-2ja-jd}$ , we have

$$\begin{aligned} \frac{1}{n} \text{KL}(\mathcal{N}(\bar{\theta}_0^J, \mathcal{C}_q) \| \mathcal{N}(0, \mathcal{C})) &\leq \frac{1}{2n} \sum_{j=1}^J 2^{j(2a-2\beta+d)} \|\theta_0\|_{\beta, \infty, \infty}^2 + \frac{\epsilon_n^2}{2} \sum_{j=1}^J 2^{-2ja} \\ &\leq \frac{\|\theta_0\|_{\beta, \infty, \infty}^2}{2n} \sum_{j=1}^J 2^{j(2a-2\beta+d)} + \frac{2^{-2a}}{2} \frac{1 - 2^{-2Ja}}{1 - 2^{-2a}} \epsilon_n^2. \end{aligned}$$

The summation in the first term above is bounded by  $\epsilon_n^2$  as derived in [30, Theorem 4.5]. Therefore,

$$\frac{1}{n} \text{KL}(\mathcal{N}(\bar{\theta}_0^J, \mathcal{C}_q) \| \mathcal{N}(0, \mathcal{C})) \leq \max \left( \|\theta_0\|_{\beta, \infty, \infty}^2, \frac{2^{-2a} - 2^{-2Ja-2a}}{1 - 2^{-2a}} \right) \epsilon_n^2. \quad (103)$$

Now consider the second term

$$\begin{aligned} &\frac{1}{n} \mathbb{E}_{Q_n} \text{KL}(P_0^n \| P_\theta^n) \\ &= \mathbb{E}_{Q_n} \int \left( \Psi_1(\theta_0(y)) \log \frac{\Psi_1(\theta_0(y))}{\Psi_1(\theta(y))} + \Psi_{-1}(\theta_0(y)) \log \frac{\Psi_{-1}(\theta_0(y))}{\Psi_{-1}(\theta(y))} \right) \nu(dy) \\ &\leq \mathbb{E}_{Q_n} \int \langle \theta(y) - \theta_0(y), \theta(y) - \theta_0(y) \rangle \nu(dy) \\ &= \mathbb{E}_{Q_n} \int \|\theta(y) - \theta_0^J(y) - (\theta_0(y) - \theta_0^J(y))\|_2^2 \nu(dy) \\ &= \mathbb{E}_{Q_n} \int \|\theta(y) - \theta_0^J(y)\|_2^2 + \|\theta_0(y) - \theta_0^J(y)\|_2^2 - 2\langle \theta(y) - \theta_0^J(y), \theta_0(y) - \theta_0^J(y) \rangle \nu(dy) \\ &\leq \mathbb{E}_{Q_n} \int \|\theta(y) - \theta_0^J(y)\|_2^2 \nu(dy) + \|\theta_0(y) - \theta_0^J(y)\|_\infty^2 \\ &= \mathbb{E}_{Q_n} \int \left| \sum_{j=1}^J \sum_{k=1}^{2^{jd}} \zeta_j Z_{j,k} \vartheta_{j,k}(y) \right|^2 \nu(dy) + \|\theta_0(y) - \theta_0^J(y)\|_\infty^2 \\ &\leq \mathbb{E}_{Q_n} \sum_{j=1}^J \sum_{k=1}^{2^{jd}} \zeta_j^2 Z_{j,k}^2 \int \vartheta_{j,k}(y)^2 \nu(dy) + \|\theta_0(y) - \theta_0^J(y)\|_\infty^2 \\ &= \sum_{j=1}^J \sum_{k=1}^{2^{jd}} \zeta_j^2 \mathbb{E}_{Q_n}[Z_{j,k}^2] + \|\theta_0(y) - \theta_0^J(y)\|_\infty^2 \\ &= \sum_{j=1}^J \sum_{k=1}^{2^{jd}} \mu_j^2 (1 - \kappa_j^2) + \|\theta_0(y) - \theta_0^J(y)\|_\infty^2 \\ &= \sum_{j=1}^J 2^{jd} \frac{\mu_j^2}{1 + n\epsilon_n^2 \tau_j^2} + \|\theta_0(y) - \theta_0^J(y)\|_\infty^2 \\ &\leq \frac{1}{n\epsilon_n^2} \sum_{j=1}^J \frac{2^{-2ja}}{\tau_j^2} + \|\theta_0(y) - \theta_0^J(y)\|_\infty^2 \\ &= \frac{1}{n\epsilon_n^2} \sum_{j=1}^J 2^{jd} + \|\theta_0(y) - \theta_0^J(y)\|_\infty^2 \\ &= \frac{2^d}{n\epsilon_n^2} \frac{2^{dJ} - 1}{2^d - 1} + \|\theta_0(y) - \theta_0^J(y)\|_\infty^2 \\ &\leq \frac{2^d/(2^d - 1)}{(\log n)^2} + C' \epsilon_n^2, \end{aligned}$$

where in the second inequality, we used the second assertion of Lemma 3.2 [30] for logistic function, the fifth inequality uses the fact that  $\theta(y) - \theta_0^J(y)$  is orthogonal to  $\theta_0(y) - \theta_0^J(y)$ . For any  $a \leq \alpha$  fix  $J = J_\alpha$  otherwise  $J = J_a$ , and then it is straightforward to check from the definition of  $\epsilon_n$  given in the assertion of the theorem that  $(2^{dJ-1}/n\epsilon_n^2) \leq (\log n)^{-2}$ . The term  $\|\theta_0(y) - \theta_0^J(y)\|_\infty^2$  is also bounded by  $C'\epsilon_n^2$  as shown in the proof of Theorem 4.5 in [30]. Consequently, the term  $\frac{1}{n}\mathbb{E}_{Q_n}\text{KL}(P_0^n \| P_\theta^n)$  is bounded above by  $\epsilon_n^2$  (upto a constant) for sufficiently large  $n$  since  $(\log n)^{-2} < \epsilon_n^2$  and the result follows.  $\square$

*Proof of Theorem 4.2.* The proof is a direct consequence of Theorem 3.2, Lemmas B.11, B.12, B.13, and Proposition 3.2.  $\square$
